1 **Title: Conserved transcriptional programming across sex and species after peripheral**  
2 **nerve injury predicts treatments for neuropathic pain**

3

4

5 **One sentence summary:** Unbiased approach to predicting safe therapies for neuropathic pain

6

7 **Authors:** Shahrzad Ghazisaeidi<sup>1,2</sup>, Milind M. Muley<sup>2</sup>, YuShan Tu<sup>2</sup>, Mahshad Kolahehdouzan<sup>1,2</sup>,  
8 Ameet S. Sengar<sup>2</sup>, Arun K. Ramani<sup>3</sup>, Michael Brudno<sup>3,4</sup>, Michael W. Salter<sup>1,2\*</sup>

9 **Affiliations:**

10 <sup>1</sup>Department of Physiology, University of Toronto; Toronto, Canada.

11 <sup>2</sup>Program in Neuroscience & Mental Health, Hospital for Sick Children; Toronto, Canada.

12 <sup>3</sup>Centre for Computational Medicine, Hospital for Sick Children; Toronto, Canada.

13 <sup>4</sup>Department of Computer Science, University of Toronto; Toronto, Canada.

14

15 \*Corresponding Author: Michael W. Salter, Hospital for Sick Children, 686 Bay Street, Toronto,  
16 Canada, M5G 0A4.

17 Email: [michael.salter@sickkids.ca](mailto:michael.salter@sickkids.ca)

18

19 **Abstract**

20 Chronic pain is a devastating problem affecting 1 in 5 individuals around the globe, with  
21 neuropathic pain the most debilitating and poorly treated type of chronic pain. Advances in  
22 transcriptomics and data mining have contributed to cataloging diverse cellular pathways and  
23 transcriptomic alterations in response to peripheral nerve injury but have focused on  
24 phenomenology and classifying transcriptomic responses. Here, with the goal of identifying new  
25 types of pain-relieving agents, we compared transcriptional reprogramming changes in the dorsal  
26 spinal cord after peripheral nerve injury cross-sex and cross-species and imputed commonalities,  
27 as well as differences in cellular pathways and gene regulation. We identified 93 transcripts in  
28 the dorsal horn that were increased by peripheral nerve injury in male and female mice and rats.  
29 Following gene ontology and transcription factor analyses, we constructed a pain interactome for  
30 the proteins encoded by the differentially expressed genes, discovering new, conserved signaling  
31 nodes. We interrogated the interactome with the Drug-Gene database to predict FDA-approved  
32 medications that may modulate key nodes within the network. The top hit from the analysis was  
33 fostamatinib, the molecular target of which is the non-receptor tyrosine kinase Syk, which our  
34 analysis had identified as a key node in the interactome. We found that intrathecally  
35 administering the active metabolite of fostamatinib, R406, significantly reversed pain  
36 hypersensitivity in both sexes. Thus, we have identified and shown the efficacy of an agent that  
37 could not have been previously predicted to have analgesic properties.

38

39 **Keywords:** Peripheral Nerve Injury, Transcriptomic, Spinal cord, therapy

40

## 41 INTRODUCTION

42 Chronic pain affects 16-22% of the population and is one of the major silent health crises  
43 affecting physical and mental health (1, 2). Neuropathic pain, which results from damage to the  
44 somatosensory system in the peripheral or in the central nervous system (CNS) (3), is the most  
45 recalcitrant type of chronic pain. Therapeutic options for neuropathic pain are limited by poor  
46 efficacy, side effects, and tolerability of even approved pain medications (4, 5).

47 Damage to peripheral nerves is known to produce persistent functional reorganization of  
48 the somatosensory system in the CNS (6). The primary afferent neurons in peripheral nerves  
49 project into the dorsal horn of the spinal cord, which is the critical first site in the CNS for  
50 integrating, processing, and transmitting pain information. Transcriptomic changes in the dorsal  
51 horn produced by peripheral nerve injury have been increasingly described (7-10) with a large  
52 emphasis on characterizing sex differences in changes in gene expression. Such studies are  
53 touted to hold promise to characterize pathological biochemical pathways that might in the future  
54 reveal targets for new therapies. However, there has been a focus on cataloging transcriptomic  
55 changes, unconnected from identifying pain therapeutics. Thus, there remains a gap between  
56 describing molecular changes in the dorsal horn and identifying new therapeutics.

57 Here, we took on the challenge of filling this gap by using a purposeful approach to  
58 explore the possibility of identifying pain-relieving drugs in an unbiased way through connecting  
59 transcriptomic changes to drug discovery. To gain power in our study we simultaneously looked  
60 not just between sexes in a single species but between sexes in two species. Unexpectedly, given  
61 the growing prominence of sex differences across biomedical sciences, we found many more  
62 commonalities than differences between sexes and across species in the gene expression changes  
63 produced in the spinal dorsal horn ipsilateral to the peripheral nerve injury. From the

64 commonalities, we built a species-conserved sex-conserved pain interactome network. With an  
65 unsupervised approach, we used this interactome to predict safe therapies that may have the most  
66 impact.

67

## 68 **RESULTS**

69 We evaluated dorsal horn transcriptomes after spared nerve injury (SNI), a widely used model of  
70 peripheral neuropathic pain (*11*), or sham surgery in male and female mice and rats, seven days  
71 surgery (Fig. 1A). We collected gray matter from the dorsal horn of L4-L5 spinal cord ipsilateral  
72 and contralateral to the surgery. In order to obtain sufficient RNA from mice, each sample was  
73 pooled from two animals. The experimenters who did the dissections, tissue removal and  
74 extraction of the RNA were unaware of which animals had undergone SNI or sham surgery.

75

### 76 **Dorsal horn transcriptomes ipsilateral to SNI form a distinct cluster**

77 To define main sources of transcriptome variability we first analyzed the datasets at the sample  
78 level by principal component analysis separately for mice and for rats. In the mouse dataset, the  
79 two principal components (PCs) PC1 (39%) and PC2 (22%) were the major PCs, explaining 61%  
80 of the overall variance (fig. S1). We found in both males and females that there was a clear  
81 clustering of the samples from the ipsilateral dorsal horn of animals that had received SNI  
82 (SNI\_ipsi) as compared to the remaining groups – contralateral to SNI (SNI\_contra), ipsilateral  
83 to sham surgery (Sham\_ipsi), and contralateral to the sham (Sham\_contra) (Fig. 1B). In the rat  
84 dataset, two principal components explained 48% and 20% of the variance and SNI\_ipsi samples

85 were distinct from the remainder (Fig. 1C). Thus, in both species there is a clear cluster primarily  
86 across PC1 of SNI\_ipsi samples separate from Sham\_contra, Sham\_ipsi and SNI\_contra.

87 In order to identify differentially expressed genes (DEGs) we did pairwise comparisons  
88 between samples of the levels of individual genes. DEGs were defined with the criteria of the  
89 adjusted P-value  $<0.01$  and  $\log_2$  fold-change absolute value greater than 0.5 ( $|\log FC| > 0.5$ ). In  
90 comparing SNI\_ipsi to the other groups we found numerous DEGs (fig. S2) whereas no DEGs  
91 were detected comparing Sham\_ipsi versus Sham\_contra within sex and species (Fig. 1D).  
92 Furthermore, there were no DEGs comparing SNI\_contra compared with Sham\_contra (Fig. 1E)  
93 or with Sham\_ipsi (Fig. 1F). Taking these findings together we conclude from both principal  
94 component analysis and DEG analyses that the transcriptomes of the dorsal horn ipsilateral to  
95 SNI are distinct from those contralateral to SNI or either of the sham groups. Moreover, because  
96 we found no differences at the gene expression level in SNI\_contra, Sham\_ipsi and  
97 Sham\_contra, we combined these groups, by sex or by species, as comparators for the remainder  
98 of our analyses (Fig. 1G).

99

## 100 **High correlation in the gene expression pattern of spinal cord dorsal horn in male and** 101 **female mice and rats after peripheral nerve injury**

102 From this analysis, we compared gene expression levels by sex and by species in the ipsilateral  
103 dorsal horn after SNI with those in the respective comparator group (Fig. 2A-D). In mice we  
104 observed that after SNI there was increased expression of 278 and 136 genes in males and  
105 females, respectively (Fig. 2A, B). In females we found 14 genes expression of which was  
106 significantly decreased after SNI where none was decreased in males (Fig. 2A, B & fig. S3). In  
107 rats, 271 genes were upregulated in the SNI\_ipsi males versus the comparator group and none

108 was decreased. Whereas in females, the expression level of 403 genes was increased, and that of  
109 13 genes was decreased, after SNI (Fig. 2C-D & fig. S3). Thus, in both mice and rats  
110 downregulation of gene levels after SNI was only observed in females, and of these DEGs there  
111 were 4 in common in both species.

112 For genes that were differentially expressed after SNI in mice we compared the change in  
113 the level of expression in males versus females (Fig. 2E) and found that the change in expression  
114 level in females was highly positively correlated with that in males ( $R_{\text{pearson}}=0.68$ ,  $p<2.2*10^{-16}$ ).  
115 As in mice, the expression levels of SNI-evoked DEGs in male and female rats showed a  
116 significant positive correlation ( $R_{\text{pearson}}=0.96$ ,  $p<2.2*10^{-16}$ , Fig. 2F). Moreover, by comparing  
117 mice and rat datasets we found that gene expression changes were significantly correlated  
118 between the two species ( $R_{\text{pearson}}=0.83$ ,  $p<2.2*10^{-16}$ , Fig. 2G). Taking these findings together we  
119 conclude that transcriptional reprogramming in response to peripheral nerve injury is significantly  
120 conserved in both sexes and in both species.

121

## 122 **Validation of combined analysis by sex and species**

123 Focusing on the genes that were differentially expressed in males and females of both species we  
124 detected 93 DEGs increased in SNI\_ipsi vs comparators (Fig. 3 A-B and table S1). In separate  
125 cohorts of animals, the validity of the RNA sequencing was tested in four of these DEGs: three  
126 of these had not been previously linked to neuropathic pain (*Rasal3*, *Ikzf1*, and *Slco2b1*) and for  
127 *P2ry12* (Table 1) which had been linked (12). For each of genes the relative expression level  
128 measured by qPCR did not differ across sex or species (fig. S4A) and there was statistically  
129 significant correlation between the relative expression level measured by qPCR and that by  
130 RNAseq (fig. S4B).

131 The function of the 93 commonly upregulated genes was examined through Gene  
132 Ontology (GO) analysis (table S2). We found significant enrichment (false discovery rate (FDR)  
133  $<0.05$ ) of 26 biological processes of which 21 are directly related to immune responses (Fig. 3C).  
134 The predominant cellular components defined by GO analysis were related to membranes and  
135 those of GO molecular function were related to protein binding and G-protein coupled purinergic  
136 nucleotide receptor activity (Fig. 3C). To interrogate cell-type specificity for the common DEGs,  
137 we deconvolved the bulk RNA-seq dataset with scMappR (13) which uses publicly available  
138 single cell-RNAseq data from the Panglao database (14). Deconvolution analysis (Fig. 3D and  
139 table S3) revealed five cell types with FDR less than 0.05 with the top three being microglia cells  
140 (FDR= $6.7 \times 10^{-19}$ , Odds Ratio= 20.1), macrophages (FDR=  $5.1 \times 10^{-12}$ , Odds Ratio= 13.9), and  
141 monocytes (FDR=  $15.8 \times 10^{-5}$ , Odds Ratio= 8.56).

142 In exploring possible sex differences in the transcriptome changes induced by SNI we  
143 found 30 genes that were differentially expressed in female mice but not in males of either  
144 species and 117 genes that were differentially expressed in female rats but not in males (Fig. 3B).  
145 Of those female-specific DEGs four were common to females of both species including genes  
146 encoding neurofilaments light (Nefl), medium (Nefm) and heavy (Nefh) polypeptide and  
147 Proline-Serine-Threonine Phosphatase Interacting Protein 1 (Pstpip1). Notably, all of these genes  
148 were decreased following SNI. Gene ontology analysis and single-cell deconvolution for female  
149 mice and for female rats (fig. S5) revealed that while the individual transcripts differed there was  
150 a pattern common in both species that these DEGs were expressed in neurons. For males 87  
151 genes were differentially expressed in male mice but not in females of either species one sex or  
152 species and we observed 9 genes that were differentially expressed in male rats but not in female  
153 rodents (Fig. 3B).

154 Together, the gene ontology analysis of the DEGs shows a pattern, biological processes,  
155 functions, cellular components and cell types, converging on microglia and immune response  
156 pathways in the dorsal horn ipsilateral to the nerve injury in both sexes and species, and at the  
157 same time the analysis reveals a female-specific pattern of DEGs conserved in both species. That  
158 there is a component of the transcriptional response of microglia genes which is conserved in  
159 both species and in both sexes, and that there is also a component of the response that shows sex  
160 differences in both species are consistent with transcriptional reprogramming in the dorsal horn  
161 reported in the literature (7, 8). Thus, we conclude that our approach of combining  
162 transcriptional profiles of sex and species together has face validity. By combining sex and  
163 species data we expected to have greater power than previous studies, and indeed we found  
164 changes in expression of genes for neuronal processes specifically in females, a finding not  
165 revealed by previous analyses.

166

### 167 **Defining a gene regulatory interactome network after peripheral nerve injury**

168 We investigated whether there may be patterns in the repertoire of transcription factors  
169 regulating expression of the genes differentially expressed in the dorsal horn following nerve  
170 injury. To this end we used the ChEA3 database (15) which integrated six databases containing  
171 experimentally-defined transcription factor binding sites identified by chromatin-immune  
172 precipitation sequencing. We interrogated the ChEA3 database with the 93 conserved DEGs  
173 identified above. With the set of DEGs common across sex and species and with a cutoff of  
174  $p < 0.01$  we identified 37 transcription factors (Fig. 4A, fig. S6 and Table.S4). Unsupervised  
175 hierarchical cluster analysis revealed 2 major clusters within the 93 conserved DEGs (Fig. 4B).  
176 Two of the transcription factors expressed in microglia that had not been previously linked to



177 pain hypersensitivity are Lymphoblastic Leukemia Associated Hematopoiesis Regulator 1  
178 (LYL1) and IKAROS Family Zinc Finger 1 (IKZF1). These transcription factors regulate 72%  
179 and 42%, respectively, of the common DEGs (Fig. 4C). We verified by PCR that expression of  
180 *Ikzf1* was increased after SNI, in a new cohort of male and female mice and rat (fig. S4A).

181 We next analyzed transcription factor regulatory network in males and females  
182 separately. To investigate which transcription factors are contributing to the differential gene  
183 expression, we used the common DEGs in male of both species (n=144), and likewise in  
184 females, (n=114) (Fig. 4D). We found male and female rodents utilize transcription factors with  
185 different priority (Fig. 4E). For the lower ranked transcription factors there was increasing  
186 divergence in the rank order between males and females. We identified two male-specific  
187 (CEBPB, ELF4) and two female-specific (ARID3A, MEF2B) transcription factors. These  
188 transcription factors are reported to be expressed principally in microglia cells and in T cells,  
189 respectively (16, 17) (Fig. 4D, Table. S4).

190

### 191 **Targeting the sex- and species-conserved neuropathic pain interactome.**

192 As the DEGs and transcription factor networks in males and females were largely similar  
193 in both species, we wondered whether we could use the common DEGs to identify drugs that  
194 might reduce pain hypersensitivity in both sexes. From the proteins encoded by these DEGs we  
195 constructed a Protein-Protein Interaction (PPI) network using STRING (<https://string-db.org>)  
196 (18) This network was constructed with interaction scores greater than 0.9 and visualized in  
197 Cytoscape (19) (Fig. 5A, table S5). The resultant PPI network contained 38 nodes and 67 edges  
198 (interactions) which is significantly greater than predicted by a set of 93 proteins drawn  
199 randomly from the genome (PPI enrichment p-value < 1.0e-16). To identify the most influential

200 nodes within the PPI network we calculated the Integrated Value of Influence (IVI) (20) for each  
201 node (table S6).

202 Separately, we interrogated the database of FDA-approved drugs – the Drug-Gene  
203 Interaction (DGIdb v4.1.0) (21) – with the list of 93 conserved DEGs. In the DGIdb we  
204 identified 186 drugs that affect one or more of the common genes (table S7). In order to find top  
205 FDA approved drugs that can target multiple influential nodes we calculated the Drug impact for  
206 each drug from the equation below (table S8).

$$207 \quad \text{Drug impact} = \frac{\sum_{i=1}^n IVI \times n}{t}$$

208 where  $n$  is representative of number of genes that are impacted by each drug and  $t$  is total number  
209 of nodes in the network. The five top-ranked were: 1- Fostamatinib, 2-Imatinib, 3-  
210 Bevacizumab, Daclizumab, Palivizumab, 4- Ibrutinib and 5- Etanercept. (Table 2).

211 From this approach we predicted that drugs affecting the most influential nodes in the PPI  
212 network may inhibit pain hypersensitivity in both sexes. We tested this prediction for the top-  
213 ranked drug, fostamatinib. Fostamatinib is a pro-drug which yields the active molecule R406 by  
214 metabolism in the liver (22). We tested the effect of R406 in males and females seven days after  
215 SNI (Fig. 5C). Given that we implicated R406 from analyzing transcriptomes from the dorsal  
216 horn, we administered this drug intrathecally. We found that R406 significantly reversed SNI-  
217 induced mechanical hypersensitivity starting within 15 (p= 0.0016) and 30 mins (p= 0.0430) of  
218 the i.t. injection (Fig. 5D) with the effect in males indistinguishable from that in females (Fig. 5D  
219 and fig. S7). These findings are evidence confirming our prediction from the analysis of the PPI  
220 network and the DGIdb that a drug not previously associated with pain may reverse chronic pain  
221 hypersensitivity.

## 222 **DISCUSSION**

223 Here, we generated a species-conserved, sex-conserved SNI-induced pain interactome network  
224 and, with an unsupervised approach, predicted safe therapies that might have the most impact in  
225 the interactome and thus might suppress pain hypersensitivity. We found that intrathecally  
226 administering R406, the active metabolite of the top-ranked FDA-approved drug fostamatinib,  
227 reversed mechanical hypersensitivity providing proof-of-concept to our approach. R406/  
228 fostamatinib, which is clinically used to treat idiopathic thrombocytopenia purpura, was designed  
229 to suppress the kinase activity of spleen tyrosine kinase (Syk) (23, 24) making this kinase the  
230 most likely molecular target for the pain-reducing activity of this drug. We observed that Syk  
231 mRNA is substantially elevated in the ipsilateral dorsal horn by SNI providing a biologically  
232 plausible explanation for the effectiveness of R406. Moreover, the pain interactome includes  
233 upstream activators of Syk, Trem2 and CCR5, and downstream effectors in Syk signaling, VAV  
234 and PI3 kinase (Fig. 5D). R406 has been found to suppress the activity of a number of kinases  
235 and receptors (25-28) and thus a combined effect on multiple sites in the interactome network,  
236 in addition to its inhibition of Syk, may contribute to the analgesic action we discovered.

237 Syk is known to be expressed strongly in immune cells particularly macrophages,  
238 microglia, dendritic cells and B lymphocytes (25). The reversal of mechanical hypersensitivity  
239 by R406 in females as well as males may seem to suggest that the cell type affected by this drug  
240 is not microglia as interventions that suppress or ablate microglia differentially reverse pain  
241 hypersensitivity in males but not in females (29). This would be the case if R406 acts to  
242 suppress a pain-driving signal from microglia. But if R406 acts to induce microglia, or a subset  
243 thereof, to produce a pain-reducing signal then microglia could be the cell type in which R406  
244 acts. Recently, a subtype of microglia, expressing cd11c, was reported to actively reverse

245 hypersensitivity (30) in both sexes raising the possibility that R406 may act on this microglia  
246 subtype which strongly expresses Syk and for which the molecular signature gene, *Itgax*, is in  
247 the SNI-induced pain interactome (Fig. 5D). Alternatively, or in addition, meningeal  
248 macrophages, which are known to express Syk, have been implicated in controlling SNI-induced  
249 pain hypersensitivity (16) . While it appears that the most likely role for Syk, and hence the  
250 effect of R406, is in immune cells in the spinal cord, we cannot rule out an effect in neurons as a  
251 small proportion of three subtypes of excitatory neurons in the dorsal horn are reported to  
252 express Syk mRNA *de novo* after SNI (16) An effect of R406, directly or indirectly, on the  
253 cellular, neuronal processes of underlying SNI-induced pain hypersensitivity is consistent with  
254 the reported degeneracy of upstream immune cell signaling and the ultimate sex- and species-  
255 commonality of the principal pathological neuronal alterations, i.e. downregulation of the  
256 potassium-chloride cotransporter KCC2 and enhanced function GluN2B-containing NMDA  
257 receptors (31) .

258         From the 93 sex-conserved and species-conserved genes, the role of the proteins encoded  
259 by 17 of these genes in neuropathic pain has not been investigated to date (table S9). Based on  
260 gene ontology analysis, out of this 17 DEGs, *Hck*, *Blnk*, *Sla*, *Lcp2* are involved in  
261 transmembrane receptor protein tyrosine kinase signaling pathway (table S10). the interaction of  
262 these genes and spleen tyrosine kinase needs to be further investigated.

263         In addition to defining the sex- and species-common genes, we explored the expression  
264 of genes for transcription factors that can regulate may regulate expression of these genes. We  
265 found that eight of the top 10 transcription factors have been linked to pain. Specifically, *IRF5*,  
266 the top-ranked transcription factor, is well-known to be markedly upregulated after peripheral  
267 nerve injury, and reducing expression of *IRF5* prevents development of pain hypersensitivity in

268 mice (32, 33). Two of the transcription factors we identified, *Lyl1* and *Ikzf1*, have not been  
269 previously implicated in chronic pain hypersensitivity. *Lyl1* is a basic helix-loop-helix (bHLH)  
270 type of transcription factor known to play a role on cell proliferation and differentiation and have  
271 a role on macrophages and microglia development (34, 35). IKZF1 is a type of lymphoid-  
272 restricted zinc finger transcription factor is known to regulate immune cells (36). It has been  
273 shown that Syk plays a crucial role for IKZF1 activation (37), therefore, R406 have a potential to  
274 disrupt IKZF1 nuclear localization and result in suppressing of IKZF1 targets.

275         The focus of the present paper on sex-conserved and species-conserved genes may seem  
276 contrary to a goal of considering sex as a biological variable in chronic pain (38). This focus  
277 was revealed by the results of our experimental and analytical design, and was only possible by  
278 examining both sexes, and both species, of rodents. It was only through testing and analyzing  
279 animals of both sexes that we were able to define those changes that are sex-different or sex-  
280 conserved without biasedly assuming that changes elucidated by studying only one sex, by far  
281 males, will generalize to the other sex. We did find sex differences in the transcriptional  
282 reprogramming of the dorsal horn that were conserved in both rats and mice. Surprisingly, given  
283 past studies, we found evidence for differential cell type transcriptional changes induced by PNI  
284 linked to neurons. Specifically, the genes upregulated in female mice and rats were, to a first  
285 approximation, preferentially expressed in dorsal horn neurons. Exploring the role of the genes  
286 and gene networks discovered by this analysis therefore opens up the possibility of investigating  
287 the causal, i.e. necessary and sufficient, roles of proteins encoded by the genes we have  
288 identified as sex-specific. From our analysis it is apparent that transcriptional reprogramming in  
289 the spinal dorsal horn in response to SNI has both sex-different and sex-conserved components.

290 In conclusion, we demonstrated that there is transcriptional reprogramming in response to  
291 peripheral nerve injury that is conserved across sex and species. From deconvolving the species-  
292 conserved, sex-conserved pain interactome with the DGIdb database we created a ranking of  
293 FDA-approved drugs that we hypothesized may impact the pain interactome network. Given  
294 that the top hit, R406, pharmacologically inhibits Syk from humans and rodents (23), our  
295 discovery that this drug reverses SNI-induced mechanical hypersensitivity predicts that  
296 fostamatinib may reduce neuropathic pain humans, a prediction that is testable. We anticipate  
297 that our findings will provide a rational basis for speeding testing of potential analgesic agents,  
298 such as fostamatinib and others that impact the nerve injury-induced pain interactome, and  
299 therefore accelerate the pace of bringing new therapeutic options to those suffering with  
300 neuropathic pain.

301

## 302 **MATERIALS AND METHODS**

### 303 **Study Design**

304 Male and female C57BL/6J mice (n=6 per sex per condition aged 6-8 weeks) and Sprague  
305 Dawley rats (n=4 per sex per condition 7-8 weeks age) were purchased from The Jackson and  
306 Charles River laboratories at least two weeks before surgeries. All animals were housed in a  
307 temperature-controlled environment with ad libitum access to food and water and maintained on  
308 a 12:12-h light/dark cycle. In all experiments, animals were assigned to experimental groups  
309 using randomization. Experimenters were blinded to drugs and sex where possible; blinding to  
310 sex was not possible in behavioural experiments. All experiments were performed with the  
311 approval of the Hospital for Sick Children's Animal Care Committee and in compliance with the  
312 Canadian Council on Animal Care guidelines.

### 313 **Peripheral nerve injury**

314 Neuropathic pain was induced in rodents using the spared nerve injury (SNI) model (Decosterd  
315 & Woolf, 2000). Briefly, animals were anesthetized with 2.5% isoflurane/oxygen under sterile  
316 conditions. An incision was made on the biceps femoris muscle's left thigh and blunt dissection  
317 to expose the sciatic nerve. As a control, sham surgery was performed with all steps except  
318 sciatic nerve manipulation. The common peroneal and tibial nerves were tightly ligated and  
319 transected in the SNI model but left the sural nerve intact. The muscle and skin incisions were  
320 closed using 6-0 vicryl sutures in both groups-

321

### 322 **Tissue collection, library preparation and RNA sequencing**

323 Animals were euthanized, and the L4-L5 lumbar dorsal horn of the spinal cord was harvested  
324 postoperative day 7 to study transcriptional changes. RNA was extracted from the tissue and  
325 preserved in RNALater (Invitrogen), and the library was prepared and sequenced using Illumina  
326 HiSeq 4000 by TCAG at The Hospital for Sick Children. The filtered reads are aligned to a  
327 reference genome using STAR (39). The genome used in this analysis was *Mus musculus*  
328 (GRCm38-mm10.0) and *Rattus Norvegicus* assembly (Rnor\_6.0) after quality control, we  
329 calculated  $\log_2(\text{CPM})$  (counts-per-million reads), and ran principal component analysis The  
330 differential gene expression analysis is done using DESeq2 (40) and edgeR (41) Bioconductor  
331 packages. Genes with adjusted p-Value  $<0.01$  and fold changes greater than  $|0.5|$  were defined as  
332 differentially expressed genes (DEGs). In this study total of 24 samples from mice and 32  
333 samples from rats were analyzed. We used three control groups (Sham\_ ipsi, Sham\_ contra and  
334 SNI\_ ipsi) as a reference to find differential expressed genes.

## 335 **Exploratory Analysis**

336 Unsupervised hierarchal clustering was done by Euclidean method, number of optimal clusters  
337 were calculated using Elbow method in R. Enrichment analysis was performed on the DEG list  
338 using the Functional Annotation Tool in the DAVID website (<https://david.ncifcrf.gov/>) The  
339 protein-protein interaction (PPI) network of the proteins encoded by the DEGs was investigated  
340 using STRING v11.0 (18) to visualize protein-protein interaction. We used Cytoscape (19)  
341 Interactions with a score larger than 0.9 (highest confidence) were selected to construct PPI  
342 networks. Single edges not connected to the main network were removed. Transcription Factor  
343 enrichment analysis was performed using ChEA3, a comprehensive curated library of  
344 transcription factor targets that combines results from ENCODE and literature-based ChIP-seq  
345 experiments (15). Deconvolution of bulk RNA seq into immune cell types was evaluated using  
346 scMappR (13). The Drug Gene Interaction Database (DGIdb v4.1.0, [www.dgldb.org](http://www.dgldb.org)) has been  
347 used to predict potential therapy for pain interactome (21) The integrated value of influence (IVI)  
348 was calculated by Influential R package (20). The impact of the drugs was calculated based on  
349 equation below:

$$Drug\ impact = \frac{Sum\ IVI_{genes} \times Number\ of\ genes}{Total\ number\ of\ nodes}$$

331

352

## 353 **Quantitative real-time reverse transcription-polymerase chain reaction**

354 RNA was isolated by digesting L4:L5 spinal cord tissues in TRIZOL (Life Technologies) and  
355 cDNA synthesized using the SuperScript VILO cDNA kit (Life Technologies). qPCR was  
356 performed for 40 cycles (95 °C for 1 s, 60 °C for 20 s). Levels of the target genes were



357 normalized against the average of four housekeeping genes (Hprt1 in mice and Eef2 in rats) and  
358 interpreted using the  $\Delta\Delta C_t$  method.

359

## 360 **Drug**

361 R406 were purchased from Axon Medchem LLC (R406-1674). It was dissolved in DMSO, and  
362 corn oil Doses were determined in pilot experiments. Seven days post-SNI, rats were removed  
363 from their cubicles, lightly anesthetized using isoflurane/oxygen, and given intrathecal injections  
364 of R406 (1mg), in a volume of 20ul by 30-gauge needle.

365

## 366 **Behavioural test**

367 Animals were randomized in experimental groups and behavioural experimenter was unaware of  
368 the treatment or design of the study. The mechanical withdrawal threshold of animals was tested  
369 on the ipsilateral paw using calibrated von Frey filaments of increasing logarithmic nominal  
370 force values. Animals were placed in custom-made Plexiglas cubicles on a perforated metal floor  
371 and were permitted to habituate for at least one hour before testing. Filaments were applied to the  
372 perpendicular plantar surface of the hind paw for one second. A positive response was recorded  
373 if there was a quick withdrawal, licking, or shaking of the paw by the animal. Each filament was  
374 tested five times with increasing force filaments (1-26g) used until a filament in which three out  
375 of five applications resulted in a paw withdrawal or when the maximal force filament was  
376 reached. This filament force is called the mechanical withdrawal threshold. The behavioural data  
377 is normalized as either percentage of baseline or presented as percent hypersensitivity.

378

379 **Statistical analysis**

380 RNA-seq datasets were analyzed in R studio. For behavioral and Realtime PCR data, datasets  
381 were tested for normality using the Shapiro-Wilk test. qPCR data analyzed with the “pcr” R  
382 package, and behavioral data were analyzed by GraphPad Prism 9.3.1. One-way analysis of  
383 variance (ANOVA) or Kruskal-Wallis test was performed when comparisons were made across  
384 more than two groups. Two-way ANOVA (Bonferroni's multiple) was used to test differences  
385 between two or more groups. T-test was performed to test differences between two groups.  
386 Statistical significance refers to \* $p < 0.05$ , \*\*  $p < 0.01$ , \*\*\*  $p < 0.001$  Data are presented as mean  
387  $\pm$  SEM.

388

## 389 References

- 390 1. J. Dahlhamer, J. Lucas, C. Zelaya, R. Nahin, S. Mackey, L. DeBar, R. Kerns, M. Von  
391 Korff, L. Porter, C. Helmick, Prevalence of Chronic Pain and High-Impact Chronic Pain  
392 Among Adults - United States, 2016. *MMWR. Morbidity and mortality weekly report* **67**,  
393 1001-1006 (2018).
- 394 2. A. S. C. Rice, B. H. Smith, F. M. Blyth, Pain and the global burden of disease. *Pain* **157**,  
395 791-796 (2016).
- 396 3. S. N. Raja, D. B. Carr, M. Cohen, N. B. Finnerup, H. Flor, S. Gibson, F. J. Keefe, J. S.  
397 Mogil, M. Ringkamp, K. A. Sluka, X. J. Song, B. Stevens, M. D. Sullivan, P. R.  
398 Tutelman, T. Ushida, K. Vader, The revised International Association for the Study of  
399 Pain definition of pain: concepts, challenges, and compromises. *Pain* **161**, 1976-1982  
400 (2020).
- 401 4. M. van Velzen, A. Dahan, M. Niesters, Neuropathic Pain: Challenges and Opportunities.  
402 *Frontiers in pain research (Lausanne, Switzerland)* **1**, 1-1 (2020).
- 403 5. R. P. Yeziarski, P. Hansson, Inflammatory and Neuropathic Pain From Bench to Bedside:  
404 What Went Wrong? *J Pain* **19**, 571-588 (2018).
- 405 6. M. Costigan, J. Scholz, C. J. Woolf, Neuropathic pain: a maladaptive response of the  
406 nervous system to damage. *Annual review of neuroscience* **32**, 1-32 (2009).
- 407 7. M. Parisien, A. Samoshkin, S. N. Tansley, M. H. Piltonen, L. J. Martin, N. El-Hachem,  
408 C. Dagostino, M. Allegri, J. S. Mogil, A. Khoutorsky, L. Diatchenko, Genetic pathway  
409 analysis reveals a major role for extracellular matrix organization in inflammatory and  
410 neuropathic pain. *Pain* **160**, 932-944 (2019).
- 411 8. F. H. G. Ahlström, K. Mätlik, H. Viisanen, K. J. Blomqvist, X. Liu, T. O. Lilius, Y.  
412 Sidorova, E. A. Kalso, P. V. Rauhala, Spared Nerve Injury Causes Sexually Dimorphic  
413 Mechanical Allodynia and Differential Gene Expression in Spinal Cords and Dorsal Root  
414 Ganglia in Rats. *Molecular neurobiology* **58**, 5396-5419 (2021).
- 415 9. S. Tansley, S. Uttam, A. Ureña Guzmán, M. Yaqubi, A. Pacis, M. Parisien, H. Deamond,  
416 C. Wong, O. Rabau, N. Brown, L. Haglund, J. Ouellet, C. Santaguida, A. Ribeiro-da-  
417 Silva, S. Tahmasebi, M. Prager-Khoutorsky, J. Ragoussis, J. Zhang, M. W. Salter, L.  
418 Diatchenko, L. M. Healy, J. S. Mogil, A. Khoutorsky, Single-cell RNA sequencing  
419 reveals time- and sex-specific responses of mouse spinal cord microglia to peripheral  
420 nerve injury and links ApoE to chronic pain. *Nature communications* **13**, 843 (2022).
- 421 10. N. T. Fiore, Z. Yin, D. Guneykaya, C. D. Gauthier, J. P. Hayes, A. D'Hary, O. Butovsky,  
422 G. Moalem-Taylor, Sex-specific transcriptome of spinal microglia in neuropathic pain  
423 due to peripheral nerve injury. *Glia* **70**, 675-696 (2022).
- 424 11. I. Decosterd, C. J. Woolf, Spared nerve injury: an animal model of persistent peripheral  
425 neuropathic pain. *Pain* **87**, 149-158 (2000).
- 426 12. T. Yu, X. Zhang, H. Shi, J. Tian, L. Sun, X. Hu, W. Cui, D. Du, P2Y12 regulates  
427 microglia activation and excitatory synaptic transmission in spinal lamina II neurons  
428 during neuropathic pain in rodents. *Cell death & disease* **10**, 165 (2019).
- 429 13. D. J. Sokolowski, M. Faykoo-Martinez, L. Erdman, H. Hou, C. Chan, H. Zhu, M. M.  
430 Holmes, A. Goldenberg, M. D. Wilson, Single-cell mapper (scMappR): using scRNA-seq  
431 to infer the cell-type specificities of differentially expressed genes. *NAR genomics and*  
432 *bioinformatics* **3**, lqab011 (2021).

- 433 14. O. Franzén, L. M. Gan, J. L. M. Björkegren, PanglaoDB: a web server for exploration of  
434 mouse and human single-cell RNA sequencing data. *Database : the journal of biological*  
435 *databases and curation* **2019**, (2019).
- 436 15. A. B. Keenan, D. Torre, A. Lachmann, A. K. Leong, M. L. Wojciechowicz, V. Utti, K.  
437 M. Jagodnik, E. Kropiwnicki, Z. Wang, A. Ma'ayan, ChEA3: transcription factor  
438 enrichment analysis by orthogonal omics integration. *Nucleic Acids Res* **47**, W212-W224  
439 (2019).
- 440 16. J. K. Niehaus, B. Taylor-Blake, L. Loo, J. M. Simon, M. J. Zylka, Spinal macrophages  
441 resolve nociceptive hypersensitivity after peripheral injury. *Neuron* **109**, 1274-  
442 1282.e1276 (2021).
- 443 17. M. Uhlen, M. J. Karlsson, W. Zhong, A. Tebani, C. Pou, J. Mikes, T. Lakshmikanth, B.  
444 Forsström, F. Edfors, J. Odeberg, A. Mardinoglu, C. Zhang, K. von Feilitzen, J. Mulder,  
445 E. Sjöstedt, A. Hober, P. Oksvold, M. Zwahlen, F. Ponten, C. Lindskog, Å. Sivertsson, L.  
446 Fagerberg, P. Brodin, A genome-wide transcriptomic analysis of protein-coding genes in  
447 human blood cells. *Science (New York, N.Y.)* **366**, (2019).
- 448 18. D. Szklarczyk, A. L. Gable, D. Lyon, A. Junge, S. Wyder, J. Huerta-Cepas, M.  
449 Simonovic, N. T. Doncheva, J. H. Morris, P. Bork, L. J. Jensen, C. V. Mering, STRING  
450 v11: protein-protein association networks with increased coverage, supporting functional  
451 discovery in genome-wide experimental datasets. *Nucleic Acids Res* **47**, D607-d613  
452 (2019).
- 453 19. P. Shannon, A. Markiel, O. Ozier, N. S. Baliga, J. T. Wang, D. Ramage, N. Amin, B.  
454 Schwikowski, T. Ideker, Cytoscape: a software environment for integrated models of  
455 biomolecular interaction networks. *Genome research* **13**, 2498-2504 (2003).
- 456 20. A. Salavaty, M. Ramialison, P. D. Currie, Integrated Value of Influence: An Integrative  
457 Method for the Identification of the Most Influential Nodes within Networks. *Patterns*  
458 *(New York, N.Y.)* **1**, 100052 (2020).
- 459 21. S. L. Freshour, S. Kiwala, K. C. Cotto, A. C. Coffman, J. F. McMichael, J. J. Song, M.  
460 Griffith, Obi L. Griffith, A. H. Wagner, Integration of the Drug–Gene Interaction  
461 Database (DGIdb 4.0) with open crowdsourcing efforts. *Nucleic Acids Research* **49**,  
462 D1144-D1151 (2020).
- 463 22. D. J. Sweeny, W. Li, J. Clough, S. Bhamidipati, R. Singh, G. Park, M. Baluom, E.  
464 Grossbard, D. T. Lau, Metabolism of fostamatinib, the oral methylene phosphate prodrug  
465 of the spleen tyrosine kinase inhibitor R406 in humans: contribution of hepatic and gut  
466 bacterial processes to the overall biotransformation. *Drug metabolism and disposition:*  
467 *the biological fate of chemicals* **38**, 1166-1176 (2010).
- 468 23. A. Podolanczuk, A. H. Lazarus, A. R. Crow, E. Grossbard, J. B. Bussel, Of mice and  
469 men: an open-label pilot study for treatment of immune thrombocytopenic purpura by an  
470 inhibitor of Syk. *Blood* **113**, 3154-3160 (2009).
- 471 24. J. Paik, Fostamatinib: A Review in Chronic Immune Thrombocytopenia. *Drugs* **81**, 935-  
472 943 (2021).
- 473 25. A. Mócsai, J. Ruland, V. L. J. Tybulewicz, The SYK tyrosine kinase: a crucial player in  
474 diverse biological functions. *Nat Rev Immunol* **10**, 387-402 (2010).
- 475 26. L. Wang, D. Aschenbrenner, Z. Zeng, X. Cao, D. Mayr, M. Mehta, M. Capitani, N.  
476 Warner, J. Pan, L. Wang, Q. Li, T. Zuo, S. Cohen-Kedar, J. Lu, R. C. Ardy, D. J. Mulder,  
477 D. Dissanayake, K. Peng, Z. Huang, X. Li, Y. Wang, X. Wang, S. Li, S. Bullers, A. N.  
478 Gammage, K. Warnatz, A. I. Schiefer, G. Krivan, V. Goda, W. H. A. Kahr, M. Lemaire,

- 479 C. Y. Lu, I. Siddiqui, M. G. Surette, D. Kotlarz, K. R. Engelhardt, H. R. Griffin, R.  
480 Rottapel, H. Decaluwe, R. M. Laxer, M. Proietti, S. Hambleton, S. Elcombe, C. H. Guo,  
481 B. Grimbacher, I. Dotan, S. C. Ng, S. A. Freeman, S. B. Snapper, C. Klein, K. Boztug, Y.  
482 Huang, D. Li, H. H. Uhlig, A. M. Muise, Gain-of-function variants in SYK cause  
483 immune dysregulation and systemic inflammation in humans and mice. *Nature genetics*  
484 **53**, 500-510 (2021).
- 485 27. S. Braselmann, V. Taylor, H. Zhao, S. Wang, C. Sylvain, M. Baluom, K. Qu, E. Herlaar,  
486 A. Lau, C. Young, B. R. Wong, S. Lovell, T. Sun, G. Park, A. Argade, S. Jurcevic, P.  
487 Pine, R. Singh, E. B. Grossbard, D. G. Payan, E. S. Masuda, R406, an orally available  
488 spleen tyrosine kinase inhibitor blocks fc receptor signaling and reduces immune  
489 complex-mediated inflammation. *The Journal of pharmacology and experimental*  
490 *therapeutics* **319**, 998-1008 (2006).
- 491 28. H.-J. Cho, E. J. Yang, J. T. Park, J.-R. Kim, E.-C. Kim, K.-J. Jung, S. C. Park, Y.-S. Lee,  
492 Identification of SYK inhibitor, R406 as a novel senolytic agent. *Aging (Albany NY)* **12**,  
493 8221-8240 (2020).
- 494 29. R. E. Sorge, J. C. Mapplebeck, S. Rosen, S. Beggs, S. Taves, J. K. Alexander, L. J.  
495 Martin, J. S. Austin, S. G. Sotocinal, D. Chen, M. Yang, X. Q. Shi, H. Huang, N. J.  
496 Pillon, P. J. Bilan, Y. Tu, A. Klip, R. R. Ji, J. Zhang, M. W. Salter, J. S. Mogil, Different  
497 immune cells mediate mechanical pain hypersensitivity in male and female mice. *Nature*  
498 *neuroscience* **18**, 1081-1083 (2015).
- 499 30. K. Kohno, R. Shirasaka, K. Yoshihara, S. Mikuriya, K. Tanaka, K. Takanami, K. Inoue,  
500 H. Sakamoto, Y. Ohkawa, T. Masuda, M. Tsuda, A spinal microglia population involved  
501 in remitting and relapsing neuropathic pain. *Science (New York, N.Y.)* **376**, 86-90 (2022).
- 502 31. J. C. S. Mapplebeck, L. E. Lorenzo, K. Y. Lee, C. Gauthier, M. M. Muley, Y. De  
503 Koninck, S. A. Prescott, M. W. Salter, Chloride Dysregulation through Downregulation  
504 of KCC2 Mediates Neuropathic Pain in Both Sexes. *Cell reports* **28**, 590-596.e594  
505 (2019).
- 506 32. T. Terashima, N. Ogawa, Y. Nakae, T. Sato, M. Katagi, J. Okano, H. Maegawa, H.  
507 Kojima, Gene Therapy for Neuropathic Pain through siRNA-IRF5 Gene Delivery with  
508 Homing Peptides to Microglia. *Molecular therapy. Nucleic acids* **11**, 203-215 (2018).
- 509 33. T. Masuda, S. Iwamoto, R. Yoshinaga, H. Tozaki-Saitoh, A. Nishiyama, T. W. Mak, T.  
510 Tamura, M. Tsuda, K. Inoue, Transcription factor IRF5 drives P2X4R<sup>+</sup>-reactive  
511 microglia gating neuropathic pain. *Nature communications* **5**, 3771 (2014).
- 512 34. S. Wang, D. Ren, B. Arkoun, A. L. Kaushik, G. Matherat, Y. Lécluse, D. Filipp, W.  
513 Vainchenker, H. Raslova, I. Plo, I. Godin, Lyl-1 regulates primitive macrophages and  
514 microglia development. *Communications biology* **4**, 1382 (2021).
- 515 35. S. San-Marina, Y. Han, F. Suarez Saiz, M. R. Trus, M. D. Minden, Lyl1 interacts with  
516 CREB1 and alters expression of CREB1 target genes. *Biochimica et biophysica acta*  
517 **1783**, 503-517 (2008).
- 518 36. A. S. Geimer Le Lay, A. Oravec, J. Mastio, C. Jung, P. Marchal, C. Ebel, D. Dembélé,  
519 B. Jost, S. Le Gras, C. Thibault, T. Borggreffe, P. Kastner, S. Chan, The tumor suppressor  
520 Ikaros shapes the repertoire of notch target genes in T cells. *Science signaling* **7**, ra28  
521 (2014).
- 522 37. F. M. Uckun, H. Ma, J. Zhang, Z. Ozer, S. Dovat, C. Mao, R. Ishkhanian, P. Goodman,  
523 S. Qazi, Serine phosphorylation by SYK is critical for nuclear localization and

- 524 transcription factor function of Ikaros. *Proceedings of the National Academy of Sciences*  
525 *of the United States of America* **109**, 18072-18077 (2012).
- 526 38. S. Ghazisaeidi, M. M. Muley, M. W. Salter, Neuropathic pain: Mechanisms, sex  
527 differences, and potential therapies for a global problem. *Annual Review of*  
528 *Pharmacology and Toxicology* **63**, (2023).
- 529 39. A. Dobin, C. A. Davis, F. Schlesinger, J. Drenkow, C. Zaleski, S. Jha, P. Batut, M.  
530 Chaisson, T. R. Gingeras, STAR: ultrafast universal RNA-seq aligner. *Bioinformatics*  
531 *(Oxford, England)* **29**, 15-21 (2013).
- 532 40. M. I. Love, W. Huber, S. Anders, Moderated estimation of fold change and dispersion for  
533 RNA-seq data with DESeq2. *Genome Biology* **15**, 550 (2014).
- 534 41. M. D. Robinson, D. J. McCarthy, G. K. Smyth, edgeR: a Bioconductor package for  
535 differential expression analysis of digital gene expression data. *Bioinformatics (Oxford,*  
536 *England)* **26**, 139-140 (2010).
- 537
- 538

539 **Acknowledgments:**

540 Authors would like to thank Dr. David Finn and Dr. Katherine Halievski, Vivian Wang, Sofia  
541 Assi for technical assistance. This research was supported by a grant from CIHR (FDN-154336)  
542 to MWS. MWS held the Northbridge Chair in Paediatric Research. SG was supported by  
543 doctoral completion award and Massey College SAR, MMM was supported by a Pain Scientist  
544 Award from the University of Toronto Centre for the Study of Pain, and by a Restracomp  
545 postdoctoral fellowship from The Hospital for Sick Children Research Training Centre. Author  
546 contributions: MWS, SG conceived the project; MWS, MB supervised the research; SG and YT  
547 designed the experiments, MM, SG, YT designed in-vivo Fostamatinib experiment, SG, MM,  
548 YT, MK collected data and executed in vivo experiments, SG, AKR performed bioinformatic  
549 analysis, AS, AKR assisted with study design and interpretation of results. SG and MWS and  
550 wrote the manuscript with input from all authors. Competing interests: Authors declare that they  
551 have no competing interests. Data and materials availability: Data supporting the findings of this  
552 study are available within the article and its Supplementary material files and from the  
553 corresponding author upon reasonable request.

554

555 **Figure legend**

556 **Fig. 1. Experimental Design and data overview.** (A) The experimental workflow is illustrated.  
557 (B-C) Scatter plot representing principal component analyses of the dimensions PC1  
558 versus PC2 samples. (B) Principal component analysis in mice. (C) principal component  
559 analysis in rats. (D-F) Volcano plots showing pair-wise differential gene expression in  
560 male and female mice and rat between comparators. (D) Sham\_ipsi vs Sham\_contra. (E)  
561 SNI\_contra vs Sham\_contra. (F) Sham\_ipsi vs SNI\_contra. (G) Summary of all groups  
562 in design matrix.

563 **Fig. 2. Transcriptome changes after SNI in male and female rodents.** (A-D) Volcano plots  
564 were obtained by plotting the log2 fold change of SNI\_ipsi against the negative Log10 of  
565 the EdgeR adjusted p-value. Genes that changed 0.5 log2(FC) or more with a significance  
566 of adj p-value <0.01 are shown red. Genes that were differentially expressed significantly  
567 ( $p < 0.01$ ) but changed less than 0.5 log2(FC) are highlighted in blue and black dots are  
568 insignificant changes. (A) male mice, (B) female mice, (C) male rat and (D) female rat.  
569 (E-G) Linear correlation of log2(FC) of SNI\_ipsi vs comparators is demonstrated. Genes  
570 that were differentially expressed in at least one dataset is considered. (E) Pearson  
571 correlation in male and female mice. (F) Pearson correlation between male and female  
572 rat. (G) and the Pearson correlation between mice and rat.

573 **Fig. 3. Peripheral nerve injury induces an immune response in rodents.** (A) Heatmap  
574 showing the expression of the genes that were differentially expressed in at least one out  
575 of four (male mice, female mice, male rat and female rat) datasets, z-scores were  
576 calculated within species. (B) Venn diagram represents the number of differentially  
577 expressed genes between datasets. (C) Gene ontology enrichment of 93 conserved genes,



578 biological processes are shown in pink, cellular components are shown in green and,  
579 molecular function are shown in blue. (D) Bar chart represents deconvolution profile of  
580 conserved genes obtained by scMappR package.

581

582 **Fig 4. Gene regulation after peripheral nerve injury.** (A) bubble plot showing transcription  
583 factors that can regulate conserved genes by ChEA3 database. (B) binary heatmap shows  
584 transcription factors and their targets. (C) Circoplot showing the relation between two  
585 novel transcription factors (LYL1 and IKZF1) and conserved genes. (D) Venn diagram  
586 represents the number of transcription factors between male, female and combined male  
587 and female datasets. (E) Bump chart visualizes the transcription factor ranking between  
588 three datasets of male, female and common (E).

589

590 **Fig 5. Targeting influential nodes inside conserved protein-protein interactome.**

591 (A) representing protein-protein interaction networks of conserved 93 DEGs retrieved  
592 from STRING database. This interaction map was generated using the maximum  
593 confidence (0.9). Color of the nodes is integrated the value of influence (IVI), Node size  
594 is relative to the node degree. Nodes without any connection are hidden from the  
595 network, edge thickness is based on evidence score. (B) Schematic diagram of  
596 experimental design for R406 *in vivo* trial. (C) Paw withdrawal threshold from von Frey  
597 filaments on the ipsilateral side 7 days after surgery in SNI animals, (N=6-  
598 7/sex/treatment) and comparing SNI ipsilateral of R406 (1mg) and vehicle. Comparisons  
599 were made by Bonferroni's multiple comparisons test \* $p < 0.05$ , \*\* $p < 0.01$ . Data are mean  
600  $\pm$  SEM.

601 Table 1- List of primers for candidate targets

| Species | Gene           | Forward primer           | Reverse Primer        |
|---------|----------------|--------------------------|-----------------------|
| Mouse   | <i>Rasal3</i>  | TCCGAGAAAATACCTTAGCCAC   | GTCCACTTCACAGTCCTCAG  |
| Rat     | <i>Rasal3</i>  | AGTGTCTGTACCAATGCGTC     | AGACTGGCTCTTGAAATGAG  |
| Mouse   | <i>Slco2b1</i> | CACTCCCTCACTTCATCTCAG    | CATTGGACAGGGCAGAGG    |
| Rat     | <i>Slco2b1</i> | CACTCCCTCACTTCATCTCAG    | TGGTTTCTGTGCGACTGG    |
| Mouse   | <i>Ikzf1</i>   | CGCACAAATCCACATAACCTG    | GGTCATCCCCTTCATCTG    |
| Rat     | <i>Ikzf1</i>   | TGGTTTCTGTGCGACTGG       | ATCCTAACTTCTGCCGTAAGC |
| Mouse   | <i>P2ry12</i>  | TAACCATTGACCGATACCTGAAGA | TTCGCACCCAAAAGATTGC   |
| Rat     | <i>P2ry12</i>  | CAGGTTCTCTCCCATGCT       | CAGCAATGATGATGAAAACC  |
| Mouse   | <i>Hprt1</i>   | CCCCAAAATGGTTAAGGTTGC    | AACAAAGTCTGGCCTGTATCC |
| Rat     | <i>Eef2</i>    | ACTGACACTCGCAAGGATG      | GGAGAGTCGATGAGGTTGATG |

602

603 Table 2- list of top FDA approved drugs

| <b>Rank</b> | <b>Top FDA Drug</b> | <b>Class</b>                                        | <b>Targets in the network</b>         | <b>Drug Impact</b> |
|-------------|---------------------|-----------------------------------------------------|---------------------------------------|--------------------|
| 1           | Fostamatinib        | Tyrosine kinase inhibitor                           | PIK3CG, HCK, LYN, CSF1R, CTSS, FCGR2B | 26.25              |
| 2           | Imatinib            | Tyrosine kinase inhibitor                           | PIK3CG, HCK, LYN, CSF1R, IKZF1        | 18.14              |
| 3           | Bevacizumab         | anti-vascular endothelial growth factor antibody    | C1QA, C1QB, C1QC, FCGR2B              | 6.63               |
|             | Palivizumab         | Anti-respiratory syncytial virus F protein antibody | C1QA, C1QB, C1QC, FCGR2B              |                    |
|             | Daclizumab          | CD25 antibody                                       | C1QA, C1QB, C1QC, FCGR2B              |                    |
| 4           | Ibrutinib           | Tyrosine kinase inhibitor                           | LYN, PLCG2                            | 6.53               |
| 5           | Etanercept          | Tumor necrosis factor alpha receptor inhibitor      | TNFRSF1B, C1QA, FCGR2B, CD84,         | 4.67               |

604

605 **Supplementary Materials:**

606 **Supplementary Figures**

607 fig. S1- Principal components of mouse and rat datasets.

608 fig. S2- Pairwise comparison of SNI\_ipsi vs each of the comparators.

609 fig. S3- Overview of differential gene expression in mice and rat datasets.

610 fig. S4- RNA-seq validation.

611 fig. S5- Gene ontology analysis and cell type profile for DEGs exclusive to sex or species.

612 fig. S6- Gene regulation of conserved genes.

613 fig. S7- R406 efficacy in male and female rats

614 **Supplementary Tables:**

615 table S1. Differentially expressed genes between four datasets.

616 table S2. Gene Ontology results for conserved genes.

617 table S3. Single cell deconvolution of conserved genes

618 table S4- List of transcription factors regulating conserved genes within sex and species

619 table S5- Protein-Protein interaction network

620 table S6- Integrated Value of Influence for conserved nodes

621 table S7. Drug interaction with conserved genes

622 table S8- Drug impact calculation on network

623 table S9- List of novel targets

624 table S10- Gene ontology analysis for 17 novel genes

625

626

627 **Abbreviations:**

628 CNS: Central Nervous System

629 SNI: Spared Nerve Injury

630 Ipsi: Ipsilateral

631 Contra: Contralateral

632 DEG(s): Differentially Expressed Gene(s)

633 PC: Principal Component

634 i.t. : Intrathecal

635 IVI: Integrated Value of Influence

636 PPI: Protein-Protein-Interaction

637 DGIdb: Drug Gene Interaction Database

638 SYK: Spleen tyrosine Kinase

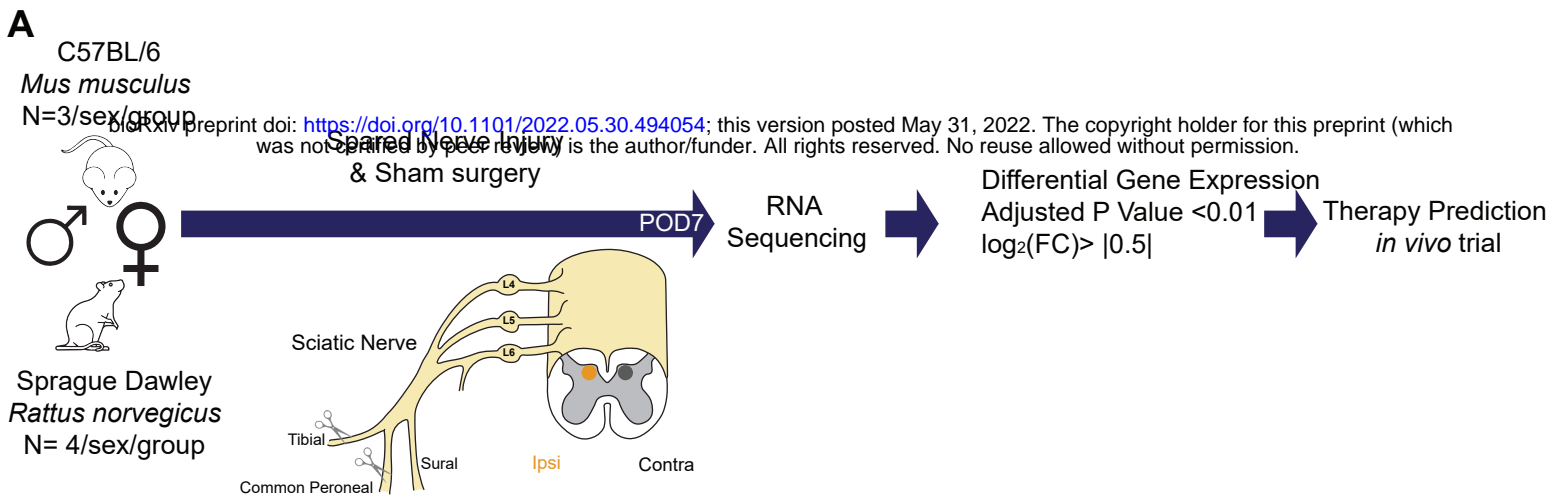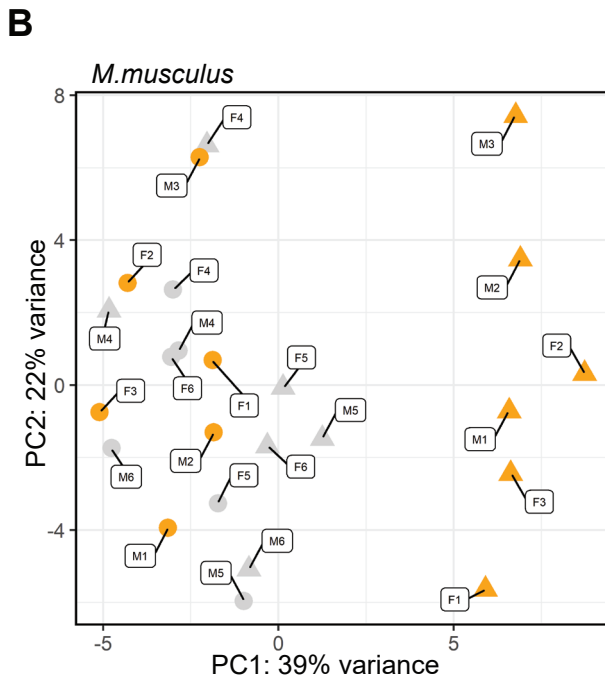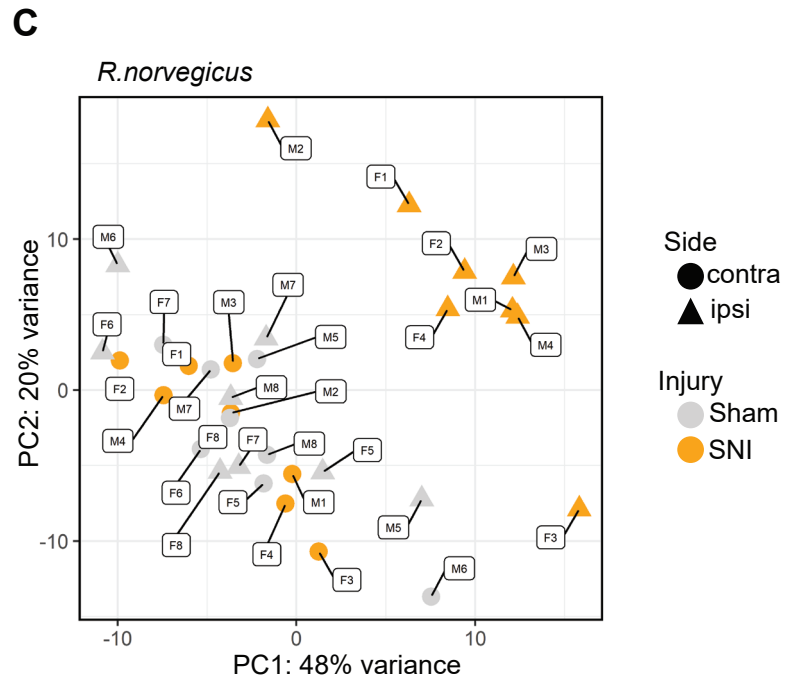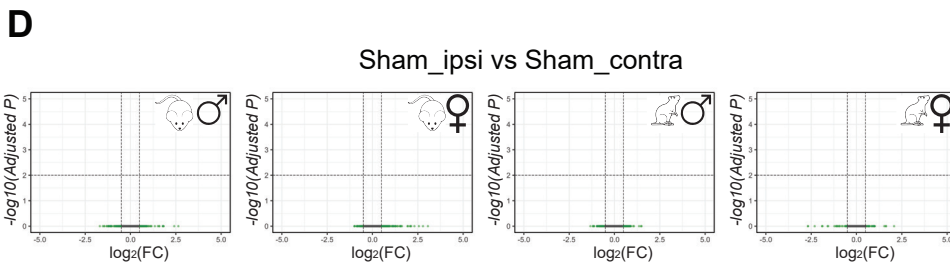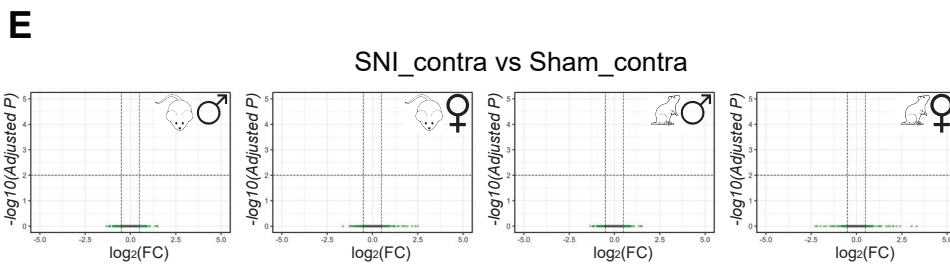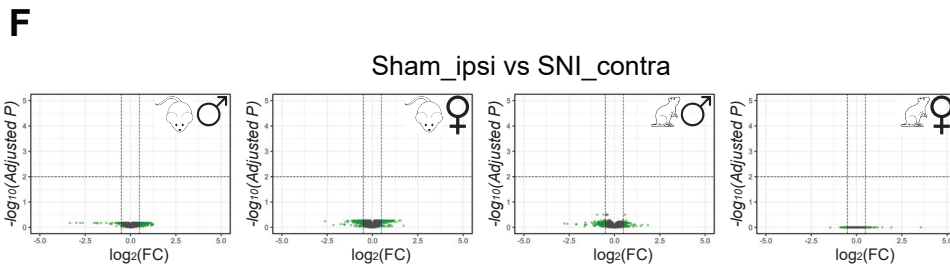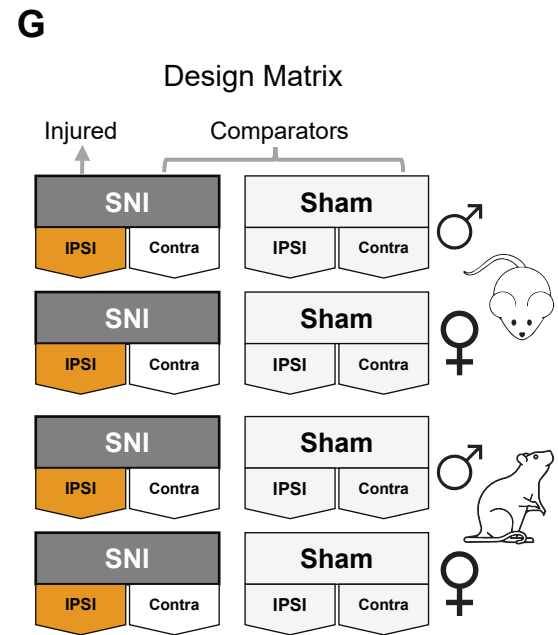

Figure 1

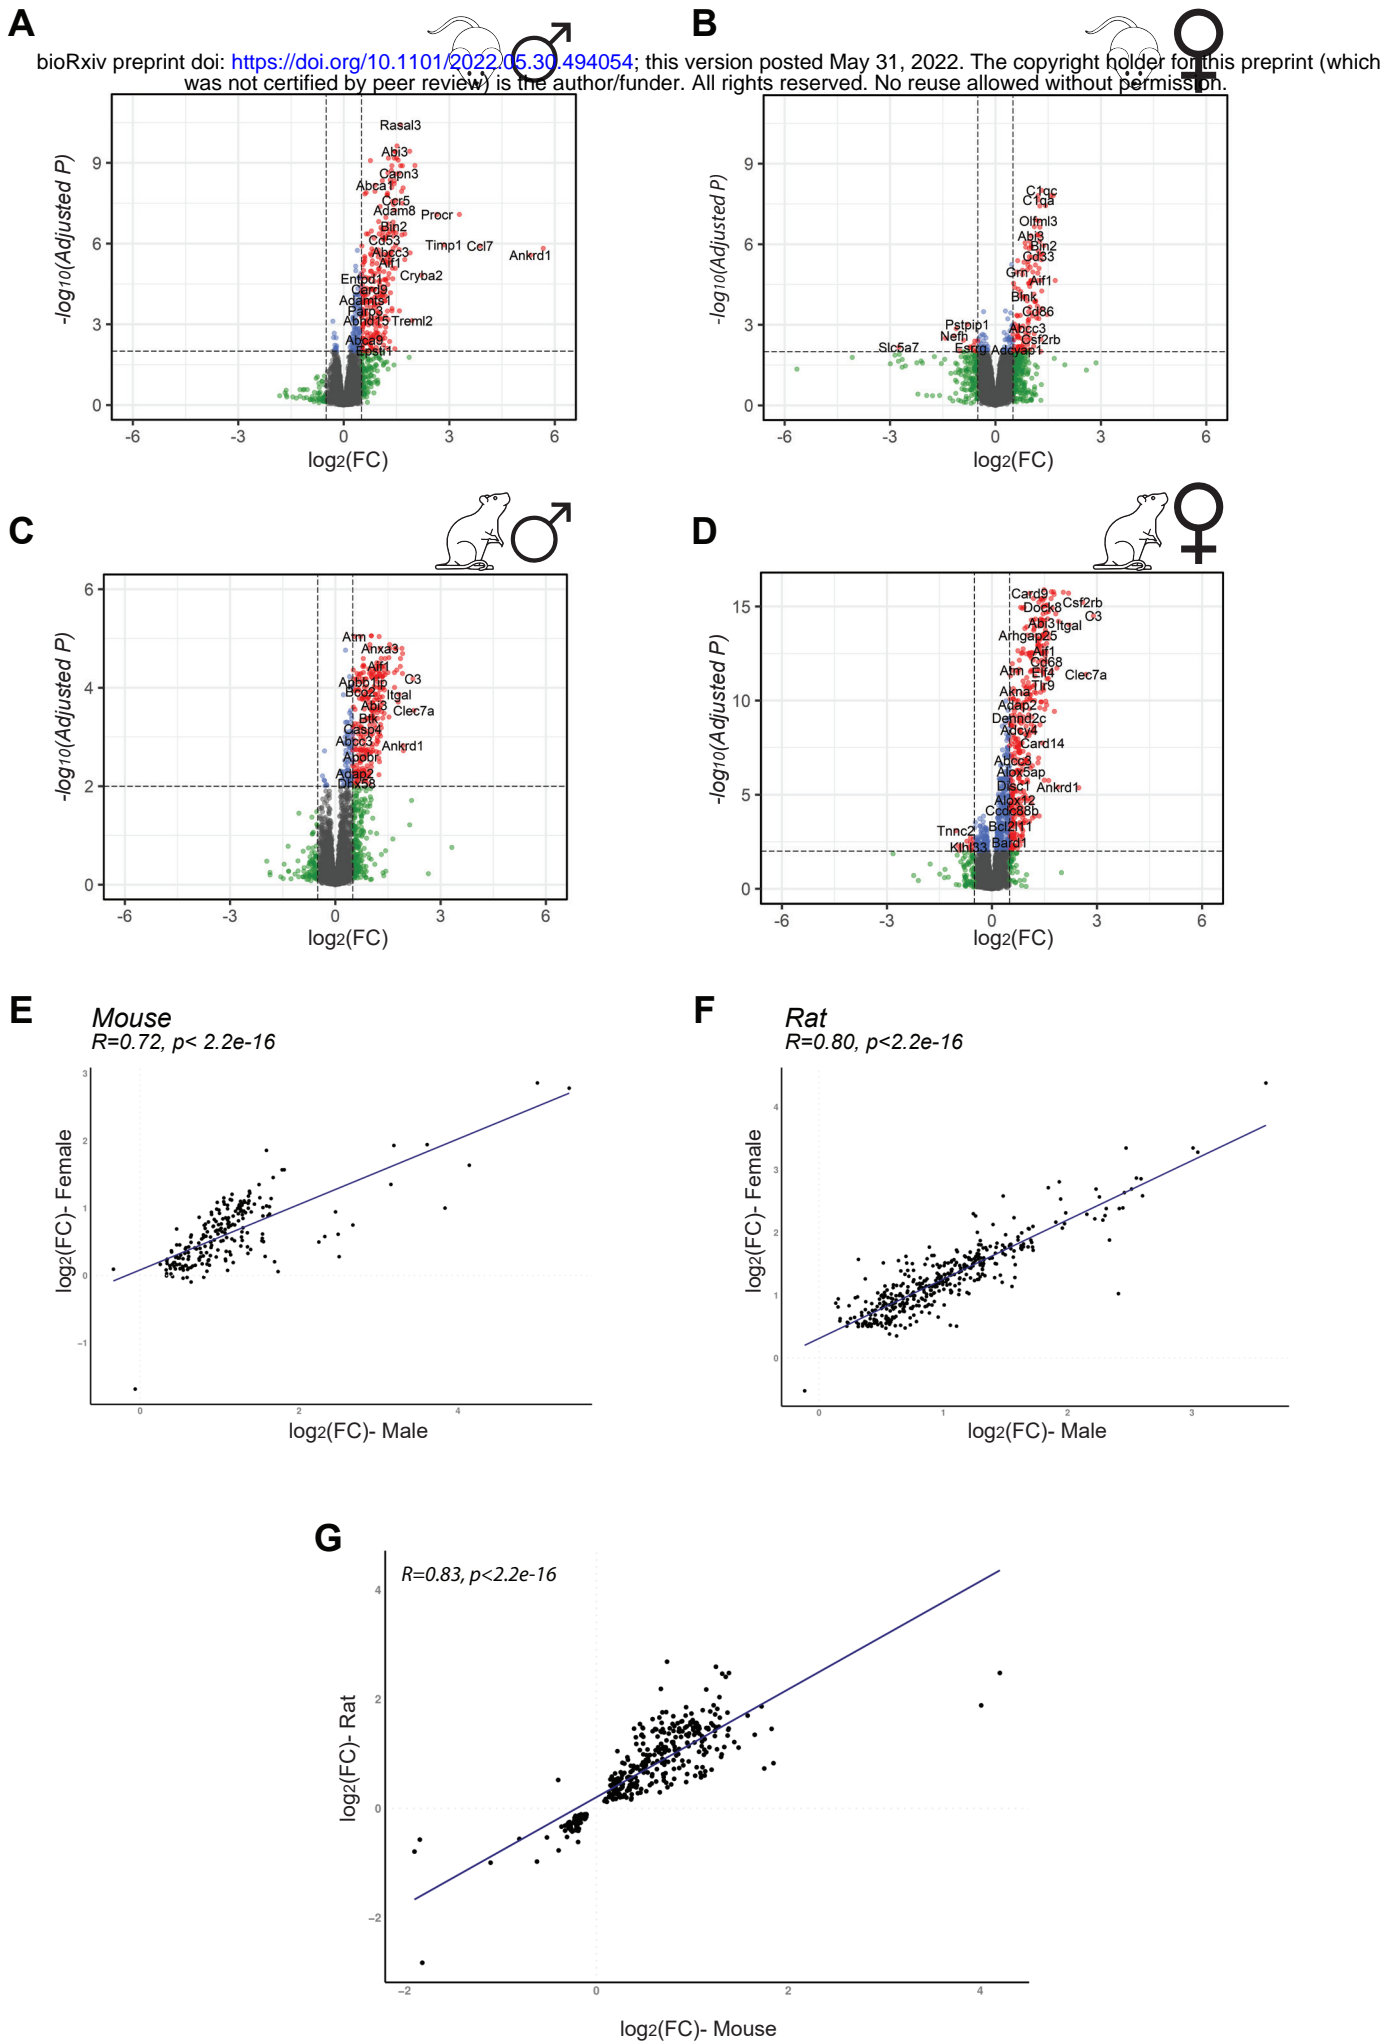

Figure 2

**A**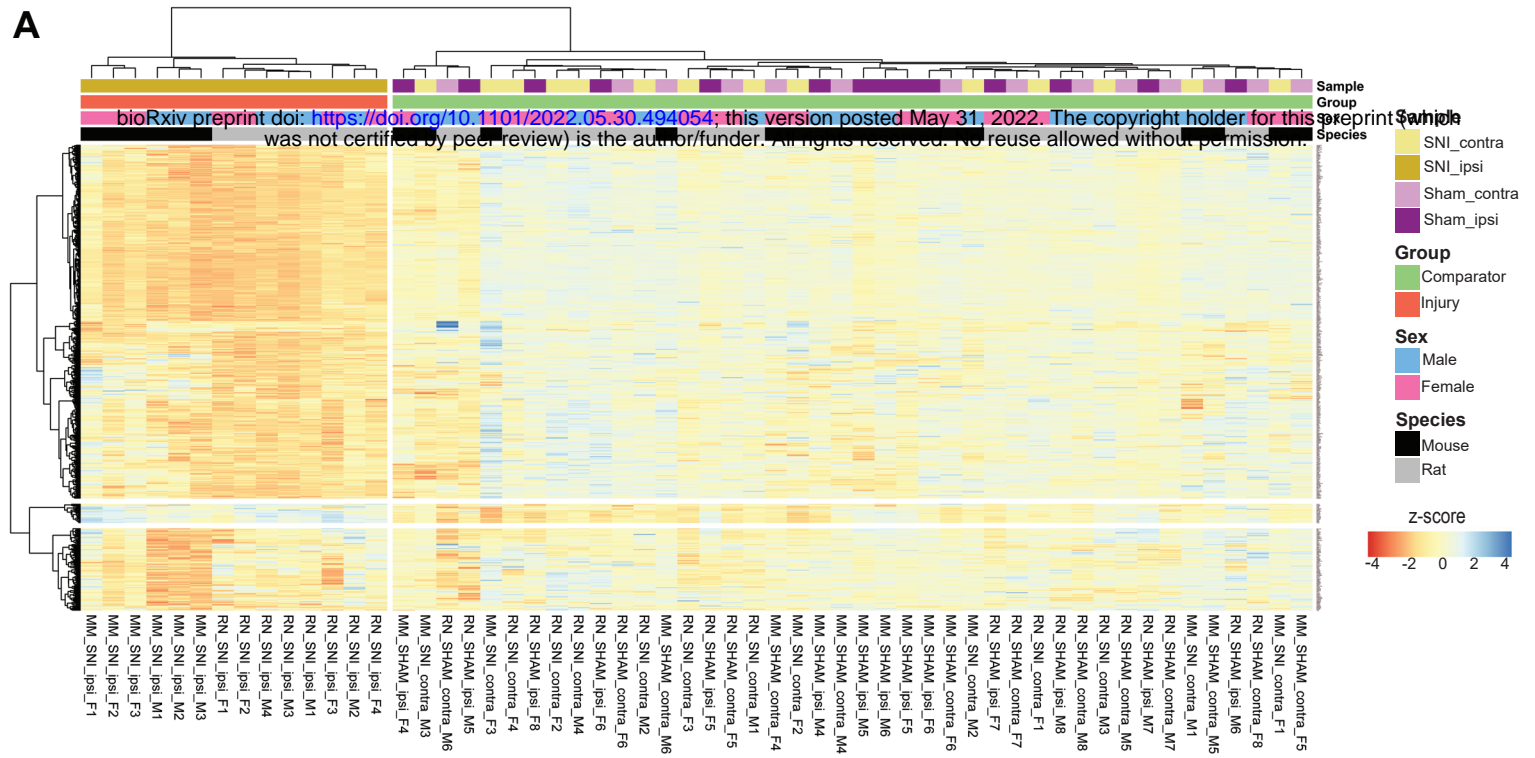**B**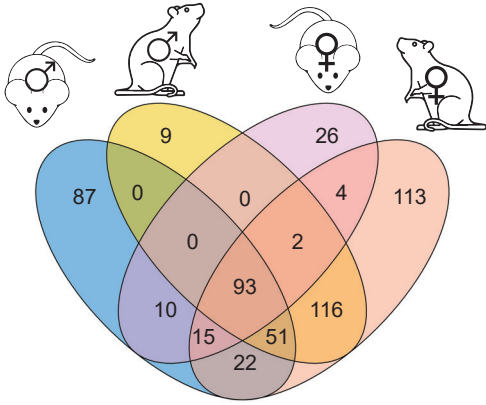**C**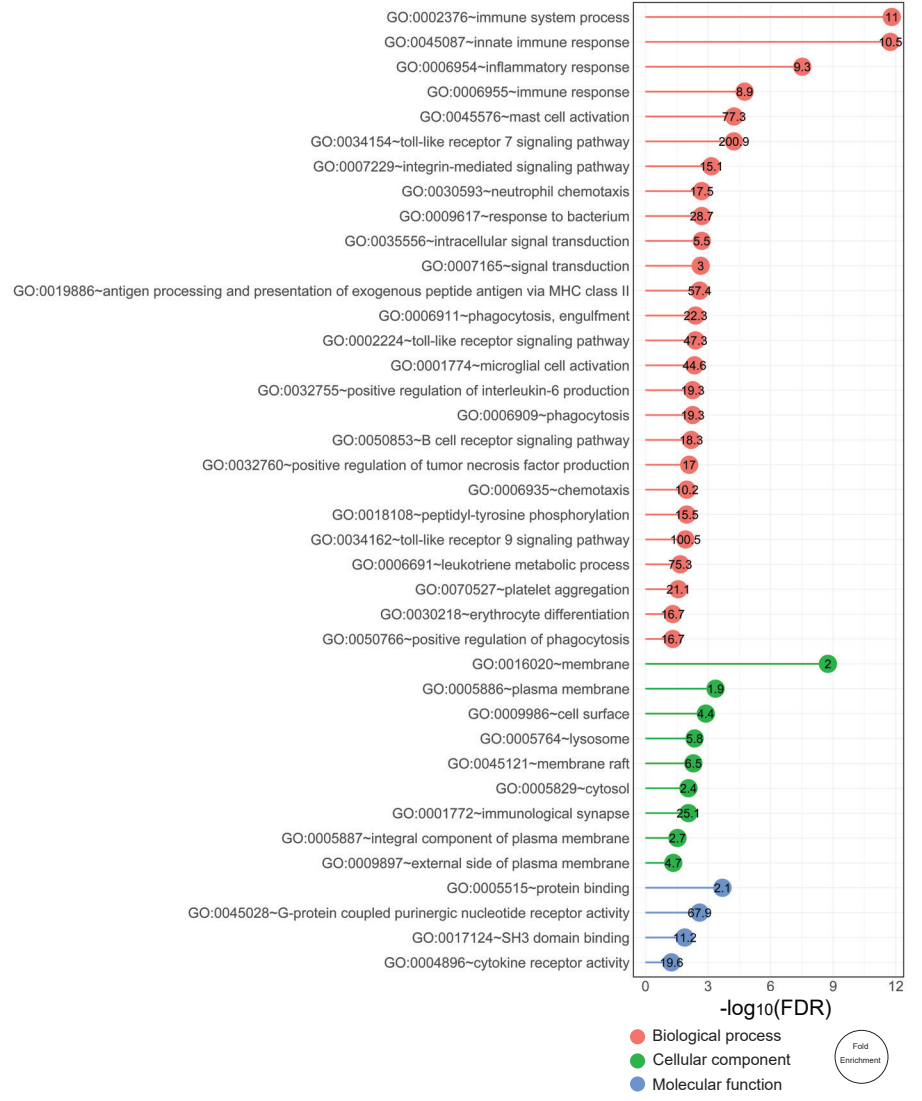**D**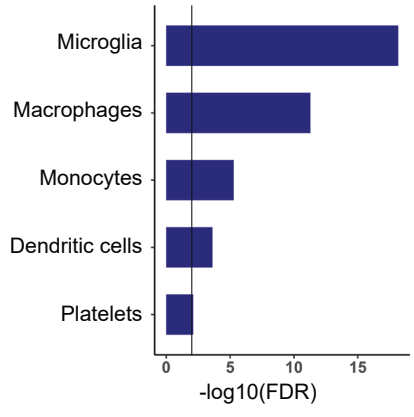**Figure 3**



**A**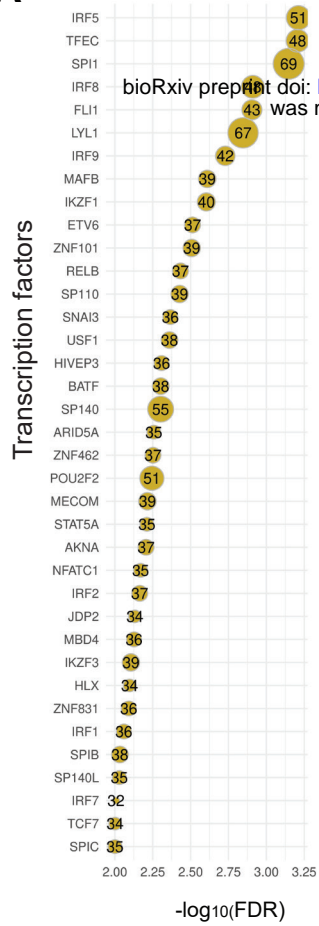**C**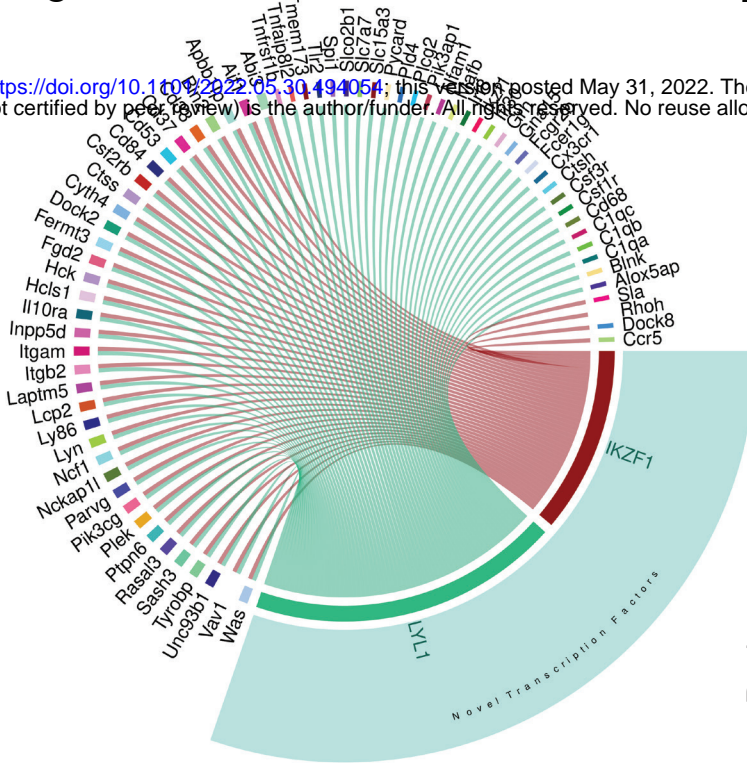**E**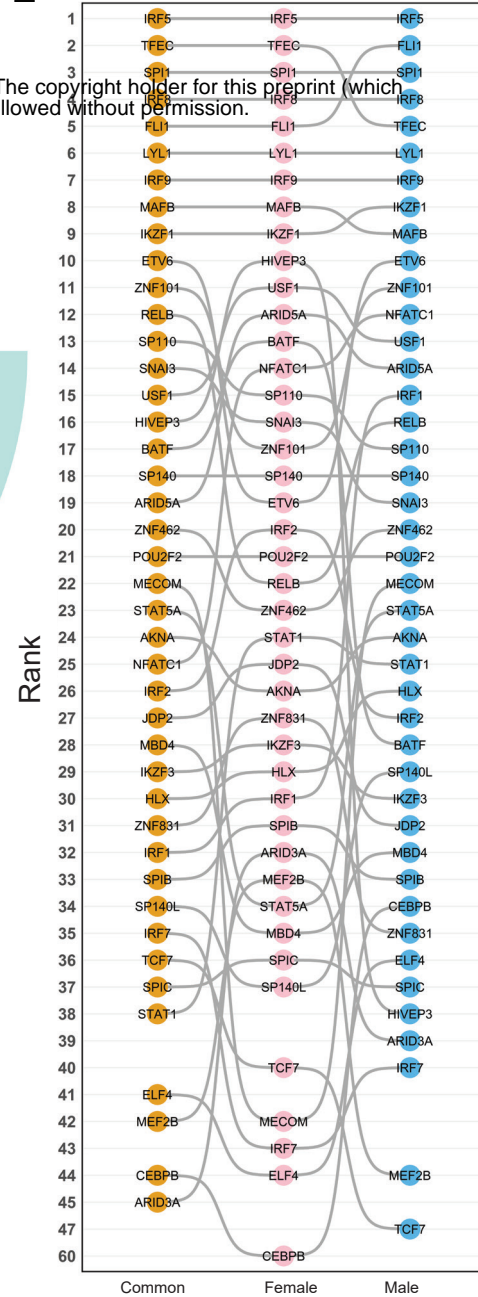**B**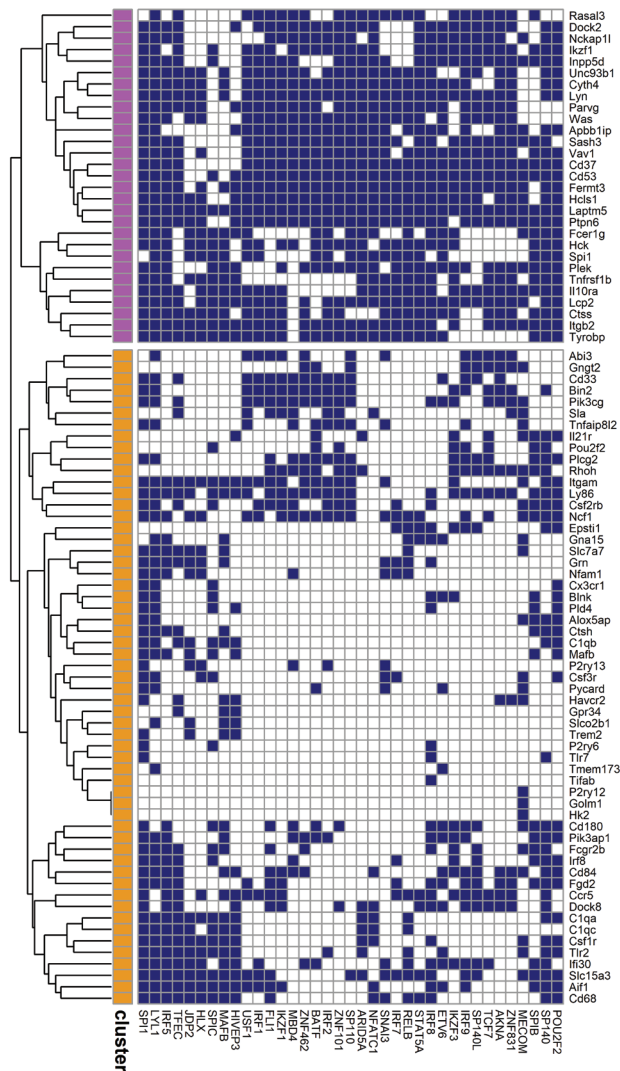**D**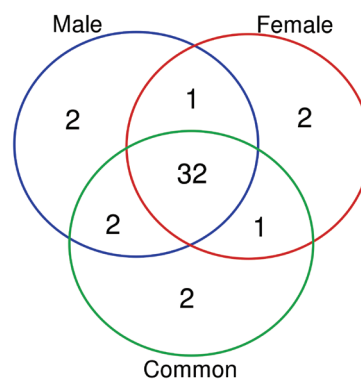

Figure 4

**A**

bioRxiv preprint doi: <https://doi.org/10.1101/2022.05.30.494054>; this version posted May 31, 2022. The copyright holder for this preprint (which was not certified by peer review) is the author/funder. All rights reserved. No reuse allowed without permission.

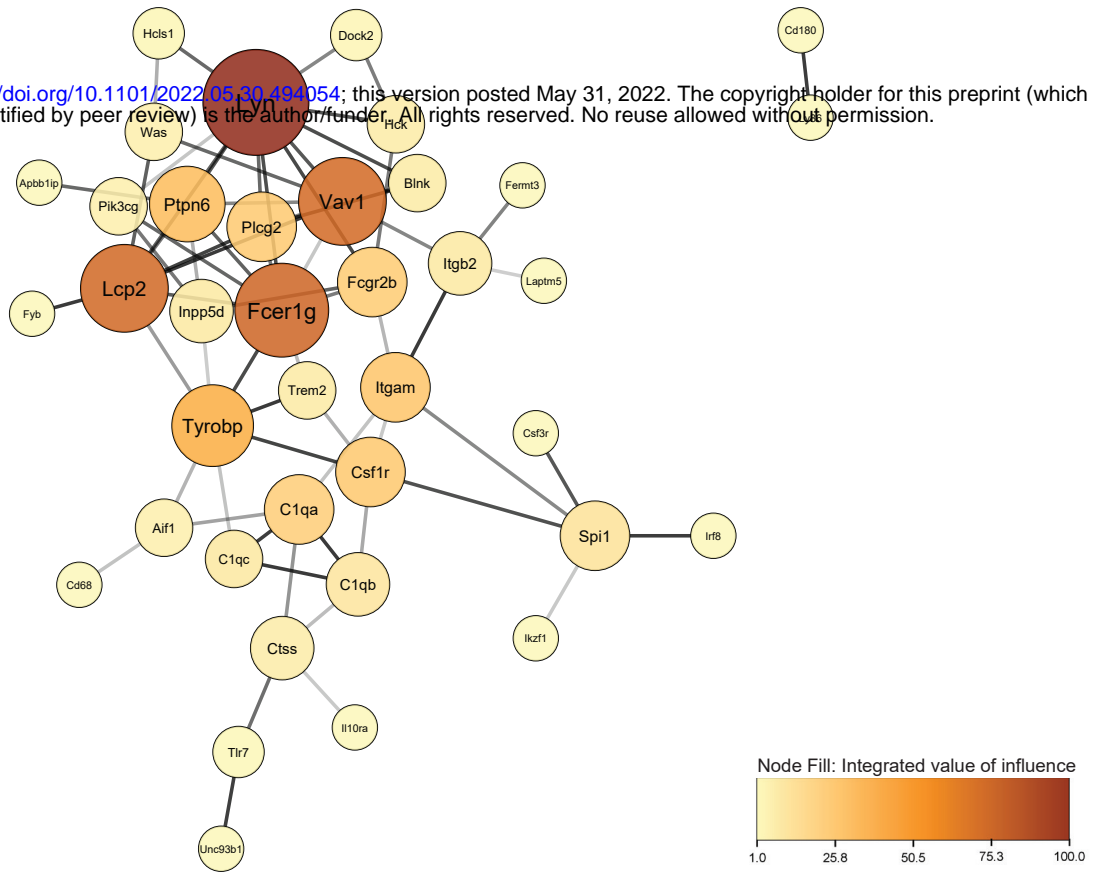**B**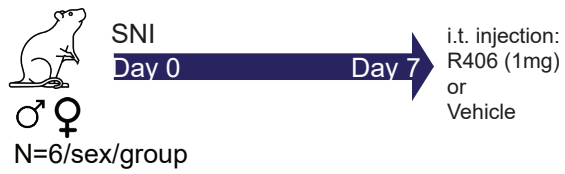**C**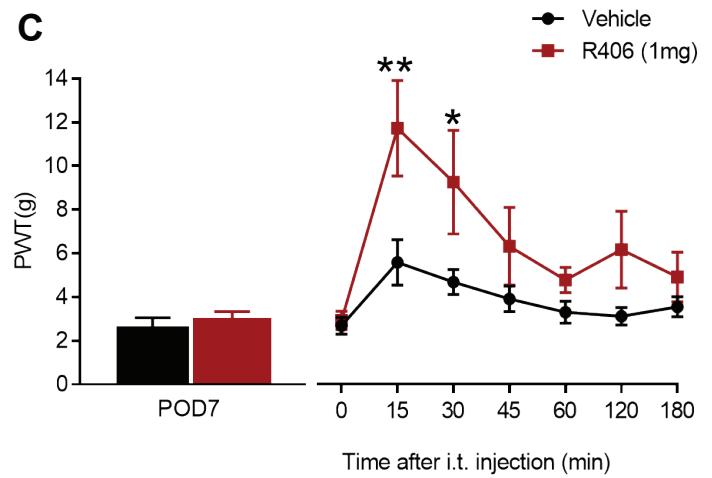

Figure 5

## 1 **Supplementary Materials**

2

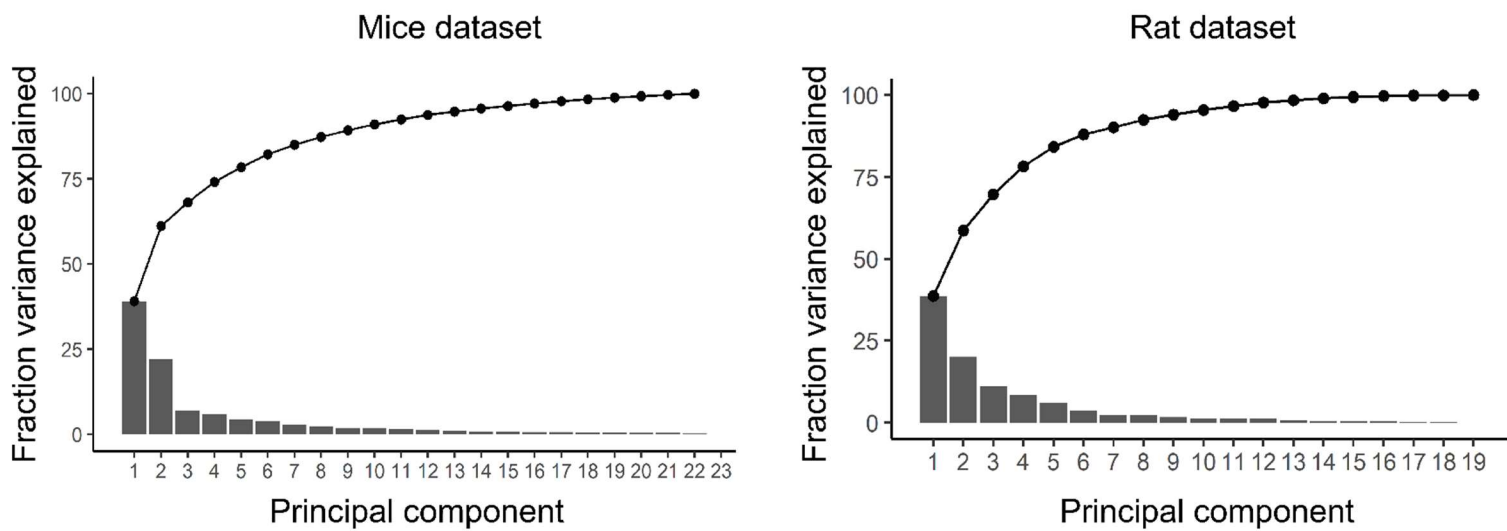

3 fig. S1 - - Principal components of mouse and rat datasets. Principal components, and explained  
4 variance from principal component analysis for mouse and rat datasets.

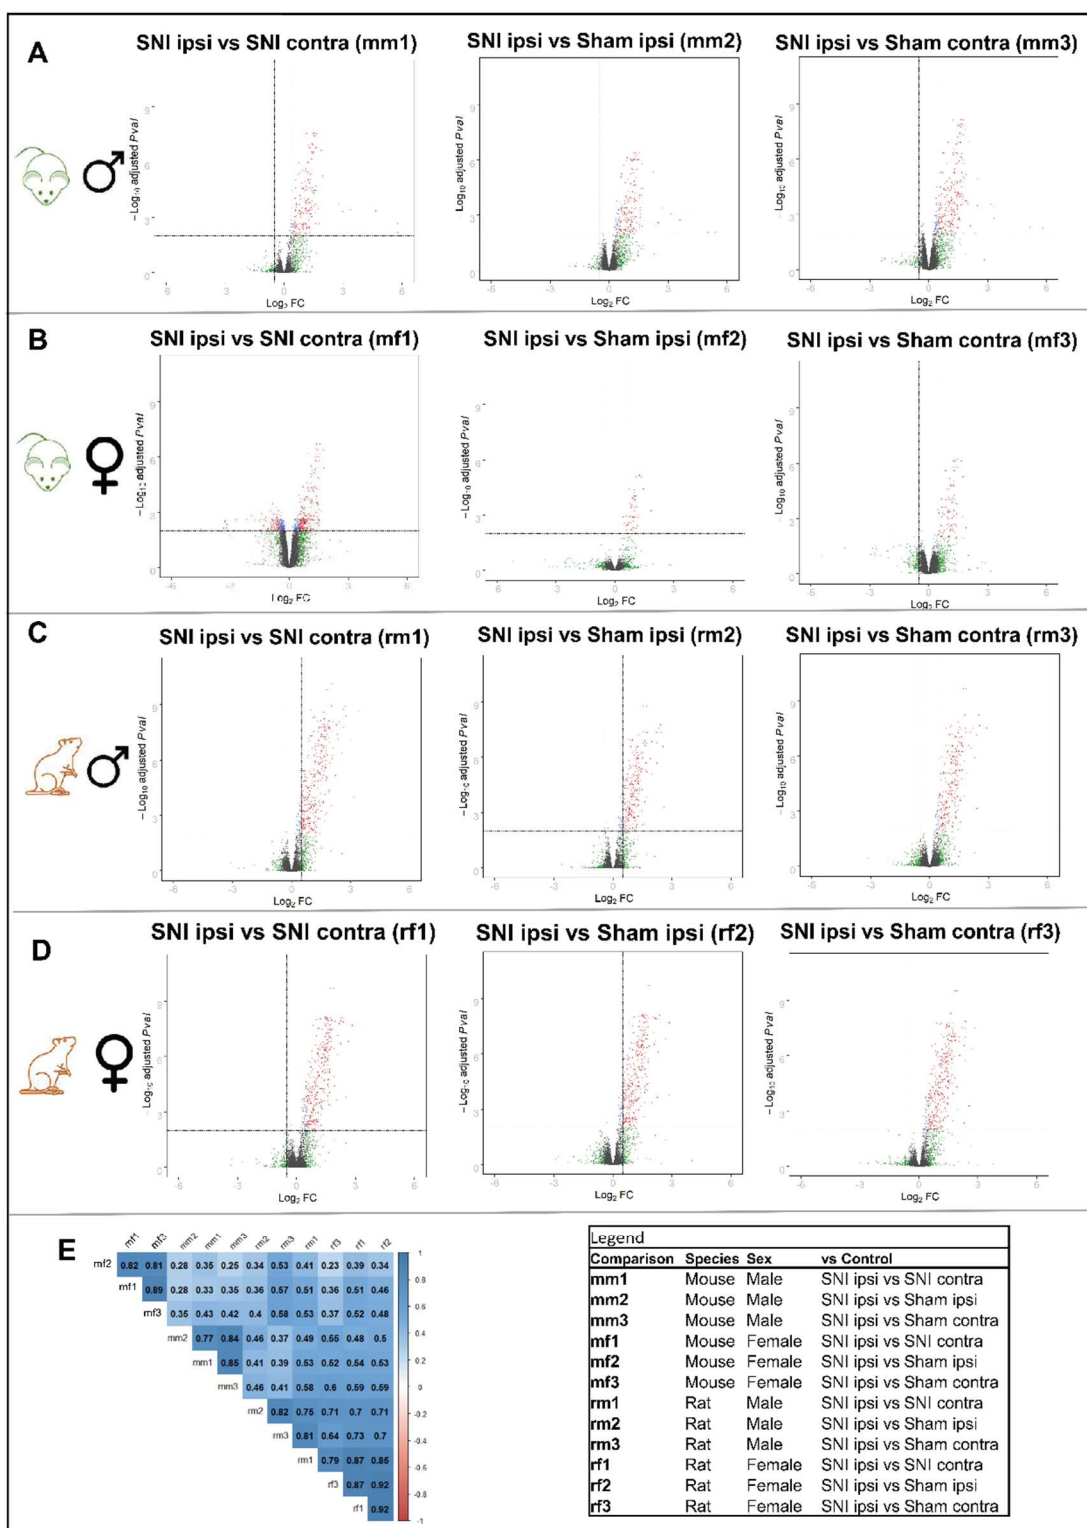

5 fig. S2- Pairwise comparison of SNI\_ipsi vs each of the comparators. (A-D) Volcano plots of  
 6 twelve pairwise comparisons (A) male mice (B) female mice (C) male rats and (D) female rats.  
 7 (E) Correlation coefficients by Pearson method between 12 comparisons.

**A**

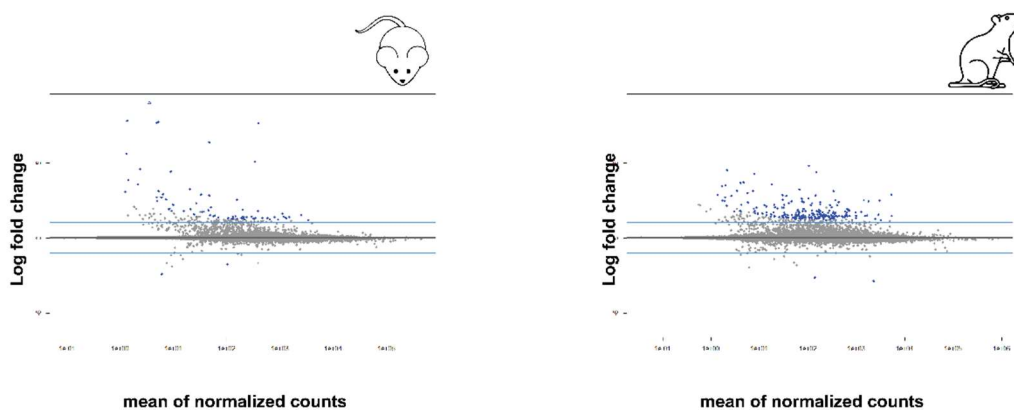

8  
9

**B**

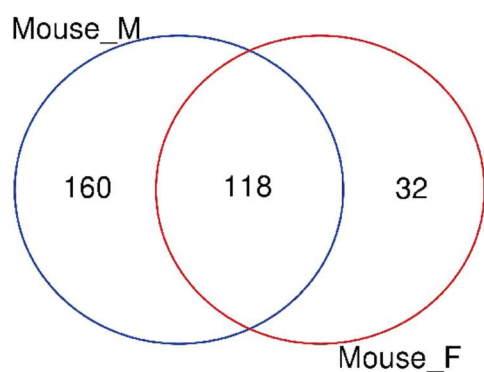

|       | Mouse_M | Mouse_F |
|-------|---------|---------|
| Up    | 278     | 136     |
| Down  | 0       | 14      |
| Total | 278     | 150     |

**C**

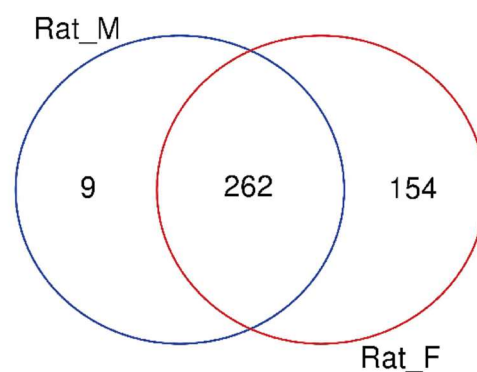

|       | Rat_M | Rat_F |
|-------|-------|-------|
| Up    | 271   | 403   |
| Down  | 0     | 13    |
| Total | 271   | 416   |

19

20 fig. S3- Overview of differential gene expression in mice and rat datasets. (A) MA plots of  
 21 injured vs not injured sex combined. (B) Venn diagram shows common DEGs between males  
 22 and females in mice and (C) Venn diagram for rat.

**A**

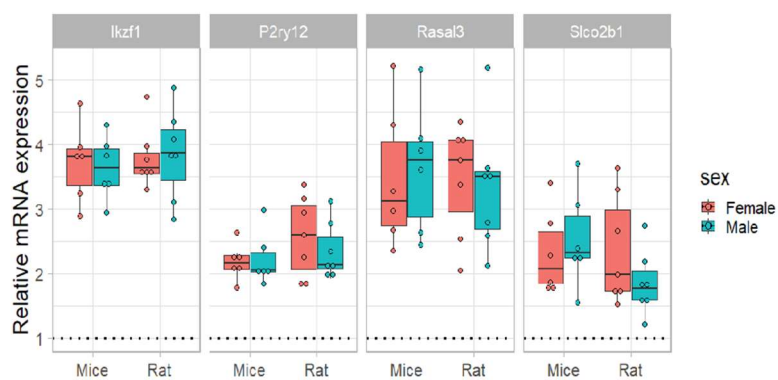

**B**

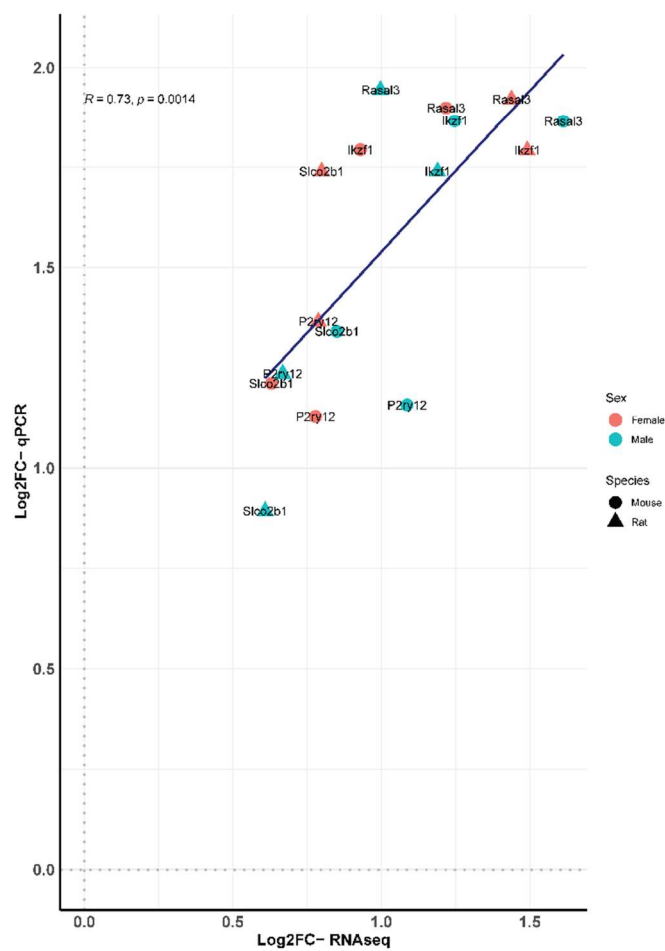

24 fig. S4- RNA-seq validation. (A) mRNA expression of 4 DEGs by qPCR, the delta-delta CT  
25 method was used to calculate the fold change vs SNI contra, the values represent the  
26 individual animal. (B) Pearson correlation of RNA-seq results and qPCR.

27



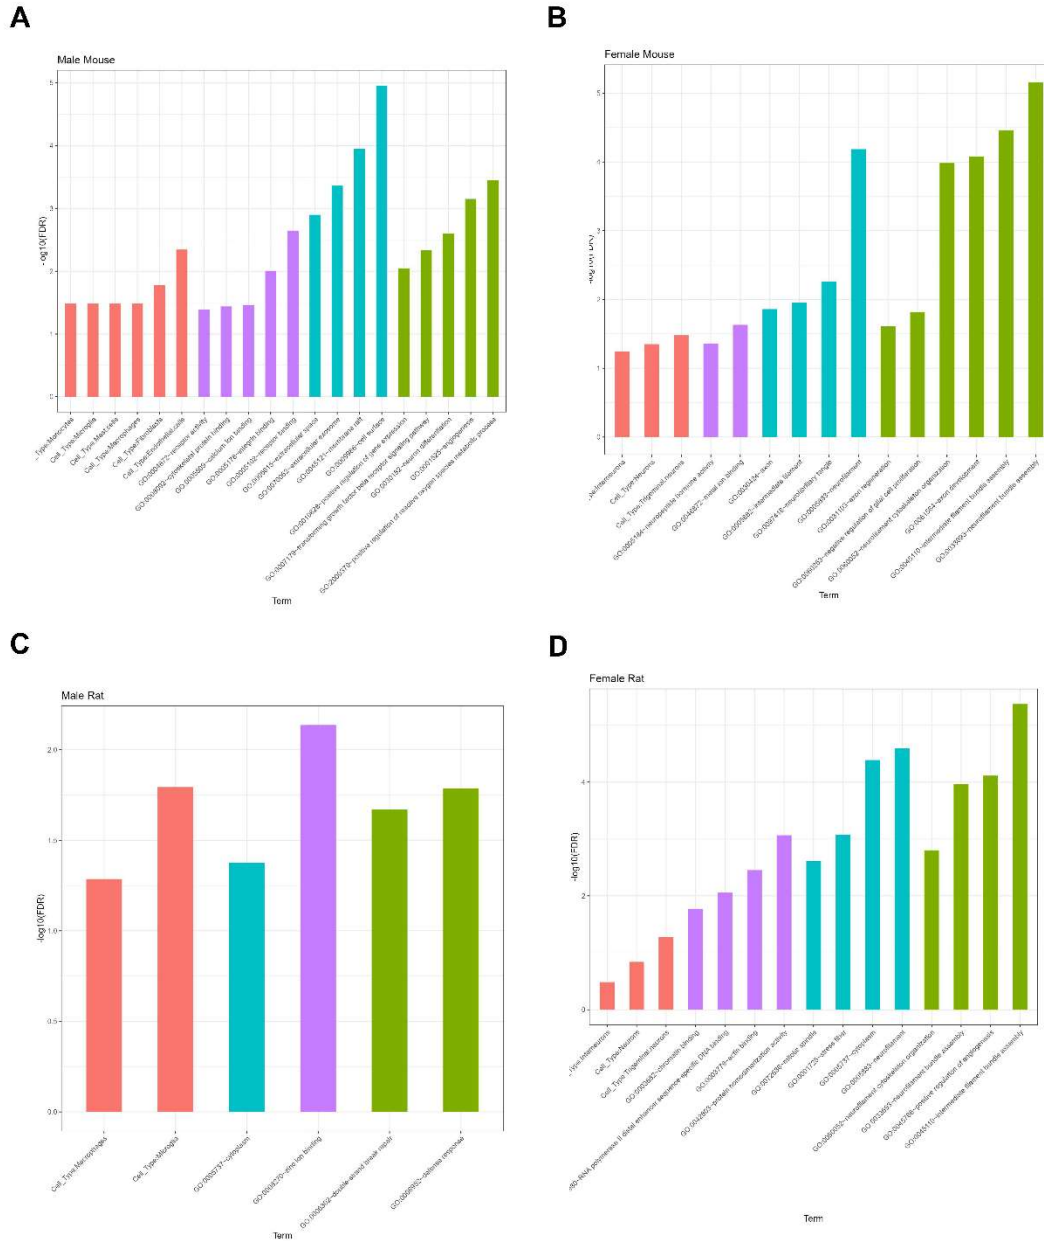

28

29 fig. S5- Gene ontology analysis and cell type profile for DEGs exclusive to sex or species. green  
 30 color represents biological process, blue: cellular component, purple: molecular function  
 31 is and red color represents cell-deconvolution. (A) male mice, (B) female mice, (C) male  
 32 rats (D) and female rats.

33

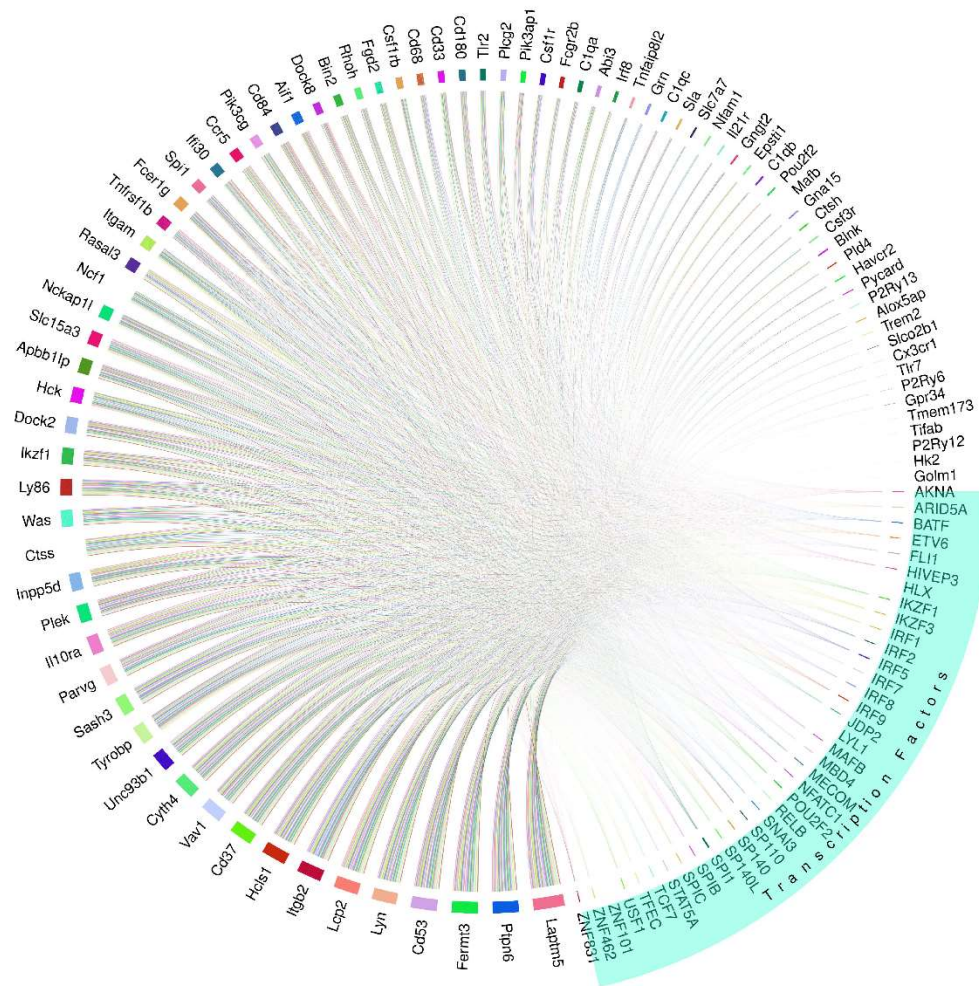

34

35 fig. S6- Gene regulation of conserved genes. Circoplots represents transcription factors and their

36 connection with common differentially expressed genes.

37

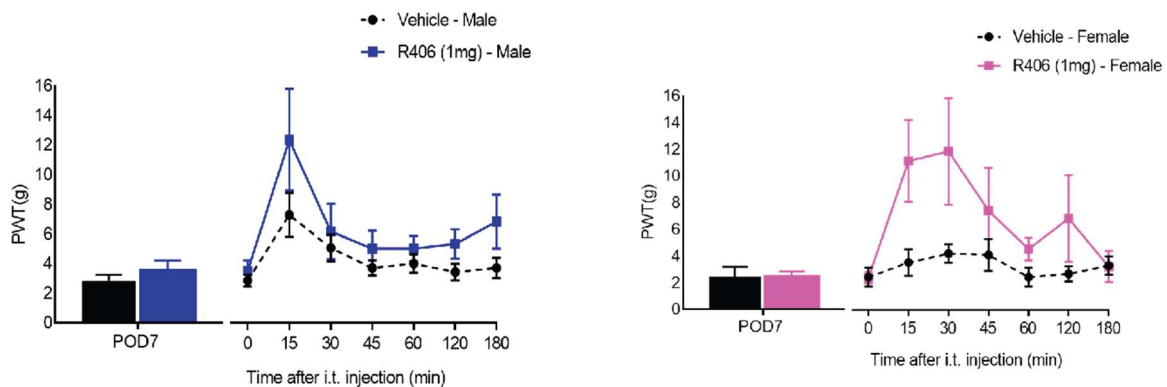

38

39

40 fig. S7- R406 efficacy in male and female rats. Paw withdrawal threshold from von Frey

41 filaments on the ipsilateral side 7 days after surgery in SNI animals, (N=6-7/sex/treatment) and

42 comparing SNI ipsilateral of R406 (1mg) and vehicle.

43
